# Supplementary material for: A conserved RNA seed‐pairing domain directs small RNA‐mediated stress resistance in enterobacteria
Source: PubMed Central journal article supplement — EMBO J. 2019 Jul 17;38(16):e101650. doi: 10.15252/embj.2019101650 (PMC6694218; doi:10.15252/embj.2019101650), 2019-07-17
Supplement: EMBJ-38-e101650-s001.pdf [file EMBJ-38-e101650-s001.pdf]

# **A conserved seed-pairing domain affords small RNA-mediated stress resistance in enterobacteria**

Nikolai Peschek<sup>1, 2</sup>, Mona Hoyos<sup>1</sup>, Roman Herzog<sup>1</sup>,  
Konrad U. Förstner<sup>3,4</sup> and Kai Papenfort<sup>1, 2, #</sup>

<sup>1</sup> Faculty of Biology I, Department of Microbiology, Ludwig-Maximilians-University of Munich, 82152 Martinsried, Germany

<sup>2</sup> Munich Center for Integrated Protein Science (CIPSM)

<sup>3</sup> TH Köln - University of Applied Sciences, Institute of Information Science, 50678 Cologne, Germany

<sup>4</sup> ZB MED - Information Centre for Life Sciences, 50931 Cologne, Germany

# Corresponding author: [kai.papenfort@lmu.de](mailto:kai.papenfort@lmu.de)

## **This supplement contains:**

Appendix Figures S1-S3

Appendix Tables S1-S5

Appendix Supplementary Material and Methods

Appendix Supplementary References

## TABLE OF CONTENTS

|                                                     |                                                                                      |
|-----------------------------------------------------|--------------------------------------------------------------------------------------|
| <b>Appendix Figure S1</b>                           | MicV controls OmpT production and OMP homeostasis                                    |
| <b>Appendix Figure S2</b>                           | MicV and VrrA mRNA target validation                                                 |
| <b>Appendix Figure S3</b>                           | Base-pairing interactions of MicV and VrrA with target mRNAs                         |
| <b>Appendix Table S1</b>                            | Global identification of $\sigma^E$ -dependent promoters in <i>V. cholerae</i>       |
| <b>Appendix Table S2</b>                            | Genes differentially regulated by either <i>micV</i> or <i>vrrA</i> pulse expression |
| <b>Appendix Table S3</b>                            | Bacterial strains used in this study                                                 |
| <b>Appendix Table S4</b>                            | Plasmids used in this study                                                          |
| <b>Appendix Table S5</b>                            | DNA oligonucleotides used in this study                                              |
| <b>Appendix Supplementary Materials and Methods</b> |                                                                                      |
| <b>Appendix Supplementary References</b>            |                                                                                      |

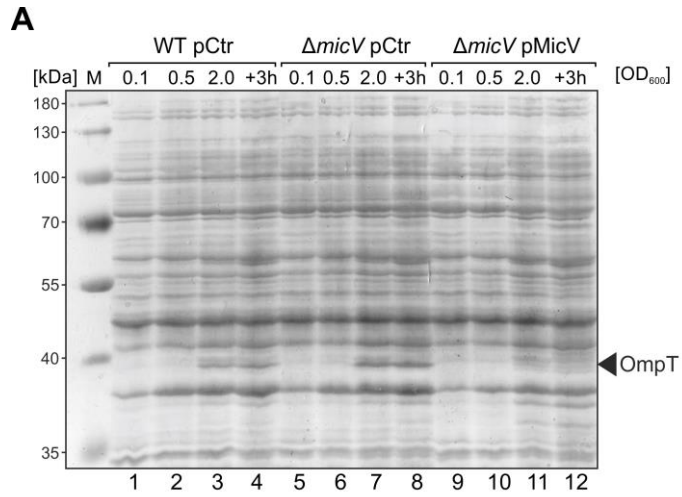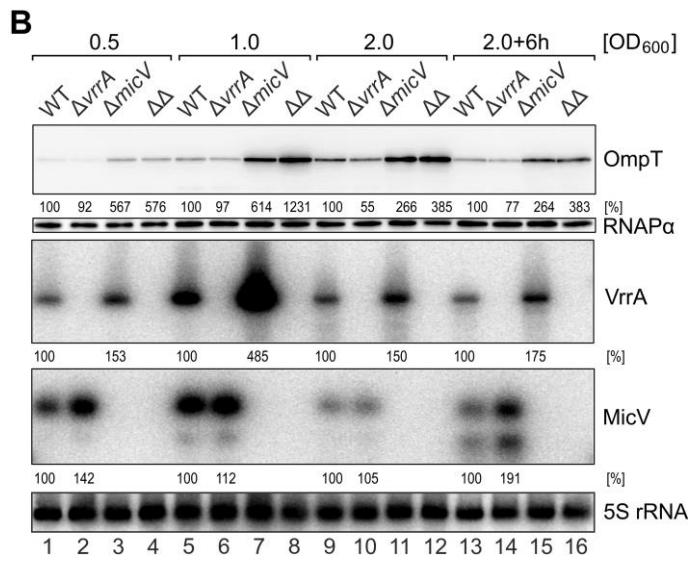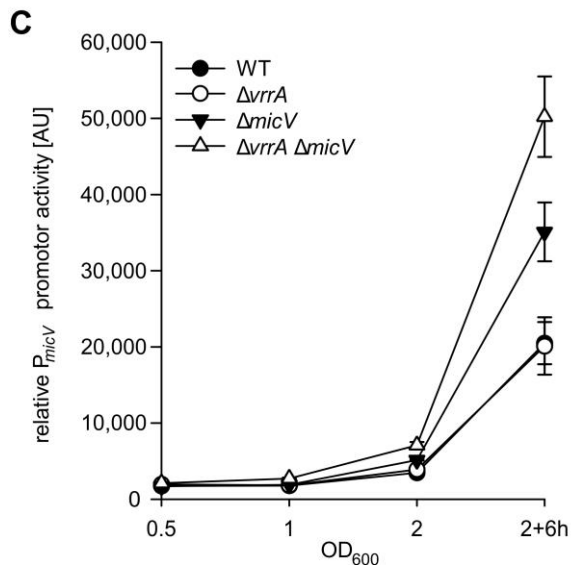

### Figure Appendix S1: MicV controls OmpT production and OMP homeostasis

**A)** *V. cholerae* wild-type and  $\Delta micV$  strains carrying empty vector control (pCtr) or *micV* expression plasmids (pMicV) were grown in LB. At the indicated time points, protein samples were collected and analyzed using SDS-PAGE and Coomassie staining. A molecular weight marker is provided on the left (M). Bands with different intensities were analyzed by mass spectrometry. **B)** *V. cholerae* wild-type,  $\Delta vrrA$ ,  $\Delta micV$  or  $\Delta vrrA \Delta micV (\Delta\Delta)$  strains carrying the *ompT::3XFLAG* gene were grown in LB and at the indicated stages of growth, RNA and protein samples were collected. RNA samples were monitored for MicV and VrrA expression on Northern blots. Protein samples were investigated for OmpT::3xFLAG production using Western blot analysis. RNAP $\alpha$  served as a loading control for Western blots and 5S rRNA served as loading control for Northern blots. **C)** *V. cholerae* wild-type,  $\Delta vrrA$ ,  $\Delta micV$  or  $\Delta vrrA \Delta micV$  strains carrying *PmicV::mKate2* plasmids were cultivated in M9 minimal medium and at the indicated stages of growth, samples were collected and tested for mKate2 fluorescence. Data information: In (C), data are presented as mean  $\pm$  SD, n = 3.

**A**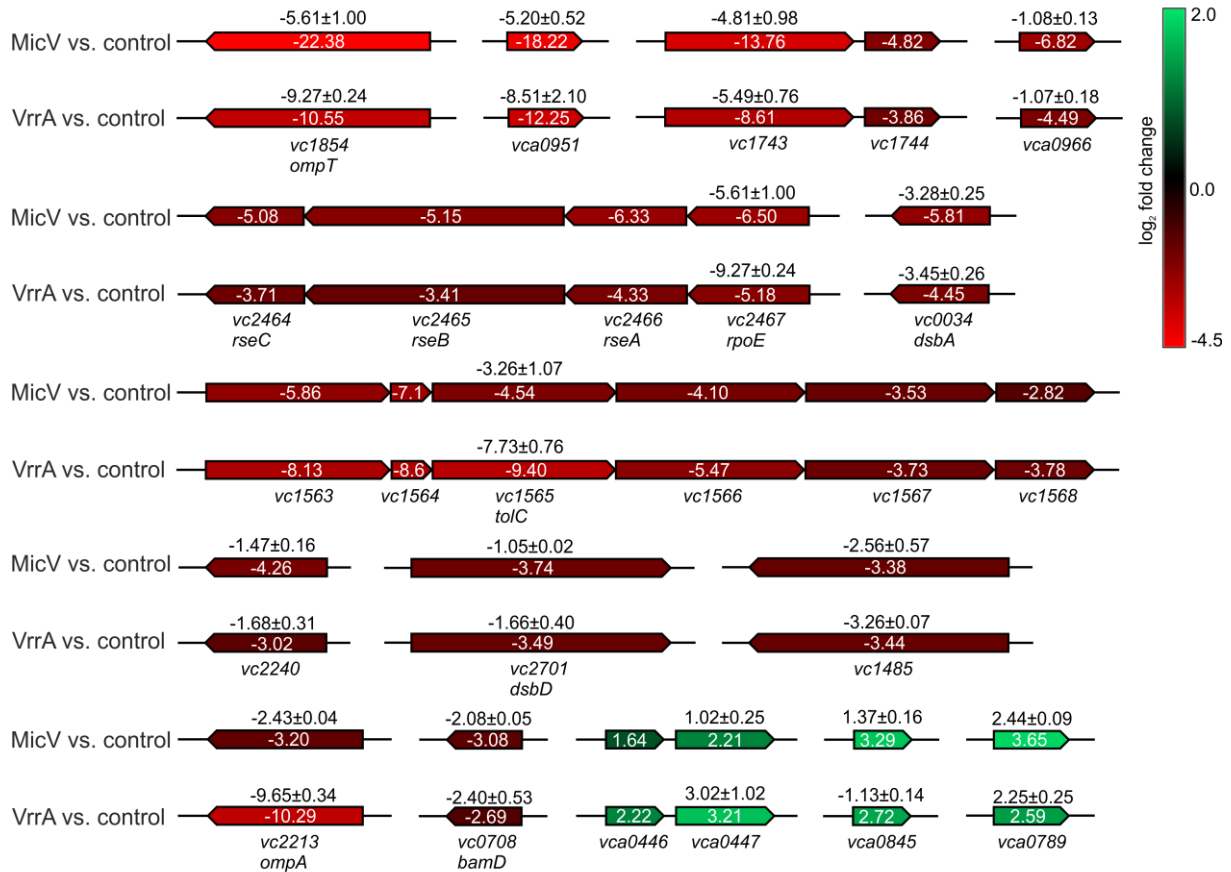**B**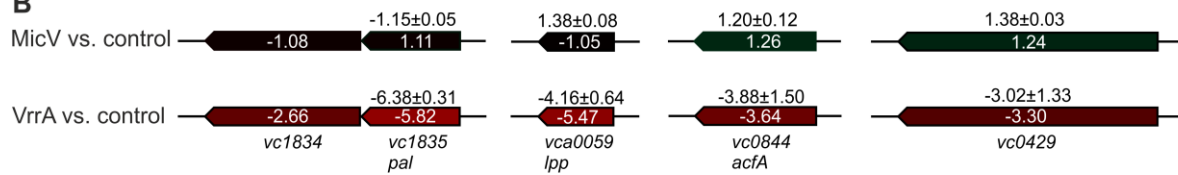**C**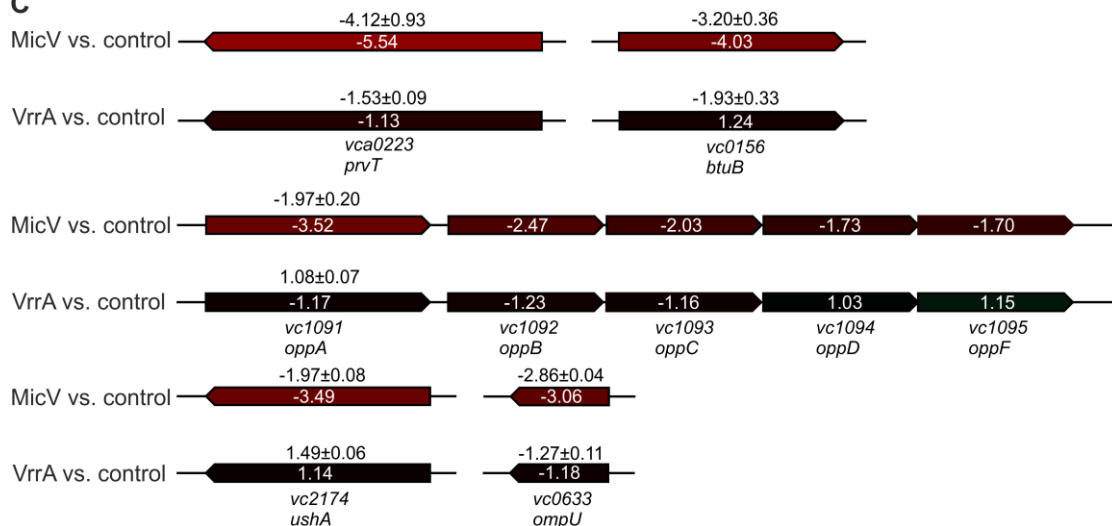

### **Appendix Figure S2: MicV and VrrA mRNA target validation**

**A, B and C)** *V. cholerae*  $\Delta vrrA \Delta micV$  strains carrying either an empty vector control (control), pBAD-micV (MicV) or pBAD-vrrA (VrrA) were grown in LB to  $OD_{600}=1.5$ . RNA samples were collected 10 min after induction with L-arabinose (0.2% final conc.) and analyzed for mRNA levels using RNA-seq or qRT-PCR. Targets determined by RNA-seq are depicted by arrows and are labelled with the fold change (white numbers). Arrows are colored according to the  $\log_2$  transformed fold change (right scalebar). For targets validated using qRT-PCR, the resulting fold-change is indicated above the tested mRNA target. The targets were grouped as follows: regulated by both sRNAs (A), regulated only by VrrA (B) or regulated only by MicV (C). Data information: In (A-C), qRT-PCR data are presented as mean  $\pm$  SD, n = 2.



**Appendix Table S1: Global identification of  $\sigma^E$ -dependent promoters in *V. cholerae***  
 Potential promoter sites in *V. cholerae* predicted with MEME on a motif search based on  $\sigma^E$ -dependent promoter sites that are found in maximal distance of 50 nt to a TSS (see Appendix Supplementary Methods). Entries marked as “orphans” are TSS which are not associated with any gene, i.e. are not located 300 nt or less upstream or downstream of an ORF (see Papenfort *et al.*, 2015, Figure 1B).

| NC_002505 | Motif hit start | Motif hit end | Motif hit seq                 | TSS position | TSS strand | TSS locus_tag | TSS gene product                                                                            |
|-----------|-----------------|---------------|-------------------------------|--------------|------------|---------------|---------------------------------------------------------------------------------------------|
|           | 13737           | 13764         | GAAATTTAGAGAAAAAGGAAAGTCTAA   | 13729        | -          | orphan        | orphan                                                                                      |
|           | 134057          | 134084        | TAAACGTTCTTCACAACCTGGTAATCAAT | 134017       | -          | VC0140        | hypothetical protein                                                                        |
|           | 139822          | 139849        | TGAACCTGTTTAAAGTGATGGTGGTCATA | 139855       | +          | VC0150        | RNA polymerase factor sigma-32                                                              |
|           | 142040          | 142067        | CAAATTTATCGGCACCTGTAGGTGTCGAT | 142104       | +          | VC0151        | soluble pyridine nucleotide transhydrogenase                                                |
|           | 163858          | 163885        | GGAAC TAGAGCAAAAAATGTTTGCCAAA | 163852       | -          | VC0165        | hypothetical protein                                                                        |
|           | 255476          | 255503        | CGAACTCTATAAAATTTAGCTGTTCTGA  | 255435       | -          | VC0249*.#     | RfbL protein                                                                                |
|           | 282410          | 282437        | CGAACTCAACAATGCCGGTTTTATCTGA  | 282451       | +          | VC0276        | bifunctional phosphoribosylaminoimidazolecarboxamide formyltransferase%2FIMP cyclohydrolase |
|           | 369659          | 369686        | TGAACCTCGCTTTGAGAAGATGGTCGAA  | 369692       | +          | VC0346        | tRNA delta%282%29-isopentenylpyrophosphate transferase                                      |
|           | 477347          | 477374        | TGAATTTTTCTGGAGTGAAGCGGTCTGA  | 477308       | -          | VC0446*       | organic solvent tolerance protein                                                           |
|           | 491005          | 491032        | GGCAGTTTTATCGGTCCACTACAGTCGAA | 490998       | -          | VC0461        | hypothetical protein                                                                        |
|           | 522911          | 522938        | TGAATTTATTGGTTTTGGTTTTATCTGT  | 522955       | +          | orphan        | orphan                                                                                      |
|           | 523404          | 523431        | GGAATAAACTTGACTTGCTGATCATA    | 523444       | +          | VC0490        | hypothetical protein                                                                        |
|           | 530444          | 530471        | TGAAC TTATAGATAGTTGAACGGCCTAA | 530436       | -          | VC0496        | hypothetical protein                                                                        |
|           | 573241          | 573268        | TGAACCGTTTGGCGCTTTGGATGCCAAA  | 573275       | +          | VC0541        | sulfate ABC transporter ATP-binding protein                                                 |
|           | 580501          | 580528        | GGCACCATGAGAGTTTACGATGTCATA   | 580551       | +          | VC0548        | carbon storage regulator                                                                    |
|           | 586889          | 586916        | CGAACTGATTCACAAAAACAAGTGCATA  | 586922       | +          | VC0554        | insulinase family protease%2Finsulinase family protease                                     |
|           | 598379          | 598406        | GGAACCTTTCAGAATCACACTCGTCTAA  | 598413       | +          | VC0565        | protease DegS                                                                               |
|           | 609707          | 609734        | GGAACCTCCACAGATGAAAATCGTCGAA  | 609700       | -          | VC0580        | hypothetical protein                                                                        |
|           | 743157          | 743184        | GAACATAAACACTGATTTTTGTGGTCAAA | 743191       | +          | VC0694        | hypothetical protein                                                                        |
|           | 757821          | 757848        | CGAACTTTTAAAAAACCGTGAGACTAA   | 757815       | -          | VC0708*.#     | hypothetical protein                                                                        |
|           | 772170          | 772197        | TGAACCTTATATGAAAATTTGTTTGCAA  | 772227       | +          | VC0719        | DNA-binding response regulator PhoB                                                         |
|           | 803818          | 803845        | CGAACTTTGCCCGGCTCTGCAATCTGA   | 803811       | -          | VC0751        | co-chaperone HscB                                                                           |
|           | 867987          | 868014        | CGCATTTTCCGGGTTAATTGCTGCCAAA  | 868043       | +          | VC0812        | helicase-like protein                                                                       |
|           | 916669          | 916696        | GCAACCAAACTCAAAATTCACAGTCTCA  | 916662       | -          | VC0851*       | small protein A                                                                             |
|           | 929880          | 929907        | TGAATTAATCGCTTTCCTGTTGTCAGA   | 929861       | -          | orphan        | orphan                                                                                      |
|           | 1063364         | 1063391       | GAACTTGAATATGTTGAGTCGATCAAA   | 1063426      | +          | VC0997        | glutaminyl-tRNA synthetase                                                                  |
|           | 1114450         | 1114477       | TGAACCTCCTCGCATAATTTCTGTCTA   | 1114444      | -          | VC1045        | RNA polymerase sigma factor                                                                 |
|           | 1158499         | 1158526       | TGAATTAATTTGCCATAAAAATGTCTTA  | 1158493      | -          | orphan        | orphan                                                                                      |
|           | 1169175         | 1169202       | TCAAATTTTTTTTGTATATTTGTCCAT   | 1169156      | -          | VC1098        | acetate kinase                                                                              |
|           | 1301806         | 1301833       | GGAACCTCATCGAAACTCGAAGTCTGA   | 1301799      | -          | orphan        | orphan                                                                                      |
|           | 1374686         | 1374713       | CGAACATTTTTTGTAGTGGTCGTATCAGA | 1374748      | +          | orphan        | orphan                                                                                      |
|           | 1469405         | 1469432       | TCCACTTCTCCTTATTATGTTATCTAT   | 1469364      | -          | VC1376        | GGDEF family protein                                                                        |
|           | 1591531         | 1591558       | GGAACCTTTTGAAGAATTGCTTGCCAAAT | 1591525      | -          | VC1486        | ABC transporter ATPase                                                                      |
|           | 1591564         | 1591591       | TGAACCAACCAACGATTTAGATATCGAA  | 1591525      | -          | VC1486        | ABC transporter ATPase                                                                      |
|           | 1602295         | 1602322       | GAAATGTTACTGAACAGGTGTTGTCCAA  | 1602328      | +          | VC1492        | hypothetical protein                                                                        |
|           | 1617120         | 1617147       | AAAACCTGTGCTAATTTTCAGTATCTGT  | 1617163      | +          | orphan        | orphan                                                                                      |
|           | 1675554         | 1675581       | TGAAC TTTCTTATCATCCTTAGTCTGA  | 1675587      | +          | VC1563        | pseudo                                                                                      |



|         |         |                               |         |   |           |                                                                                                                 |
|---------|---------|-------------------------------|---------|---|-----------|-----------------------------------------------------------------------------------------------------------------|
| 1744512 | 1744539 | GGAACATCACGCCATTAATCGAATCGAA  | 1744545 | + | VC1623    | carboxynorspermidine decarboxylase                                                                              |
| 1856343 | 1856370 | GGAACTTTTGCGGTGCCAGTTGACTGA   | 1856377 | + | VC1718    | hypothetical protein                                                                                            |
| 1878650 | 1878677 | GGAACCTTTGCCAAACGCCAGTCTGA    | 1878684 | + | orphan    | <b>vrrA</b>                                                                                                     |
| 1903913 | 1903940 | TGCACTAATCAGCATATTGTTTATCTGA  | 1903967 | + | VC1764    | hypothetical protein                                                                                            |
| 1937499 | 1937526 | CAAACCTATTAGCTGTAGTGGTCAACTAA | 1937568 | + | VC1788    | hypothetical protein                                                                                            |
| 2049280 | 2049307 | TAAACCTTCGTTAAAAACGCGATCTAA   | 2049274 | - | orphan    | orphan                                                                                                          |
| 2068844 | 2068871 | CGAACCTTTGAAATATGCGCATCTTA    | 2068808 | - | VC1918    | peptidyl-prolyl cis-trans isomerase D                                                                           |
| 2093516 | 2093543 | CAAACGTTTGCCTGTGGATGTTATCAA   | 2093565 | + | VC1942    | bifunctional 5%2C10-methylene-tetrahydrofolate dehydrogenase%2F5%2C10-methylene-tetrahydrofolate cyclohydrolase |
| 2111173 | 2111200 | GAACAGTATGCGCAATTTGGTTGTCAGA  | 2111167 | - | VC1957    | hypothetical protein                                                                                            |
| 2140363 | 2140390 | GGAACCTGCGCAGCTACTTGGGGTCGAT  | 2140356 | - | VC1987*,# | outer membrane lipoprotein Slp                                                                                  |
| 2164623 | 2164650 | TGACTTTATCGAGGATTATGGTGTCTGA  | 2164617 | - | orphan    | orphan                                                                                                          |
| 2196838 | 2196865 | GCAACCAAAGCTGGAATCACTGTCTGA   | 2196871 | + | VC2040    | hypothetical protein                                                                                            |
| 2248788 | 2248815 | GGAATTCGACCAAGATAGCGCTCTAA    | 2248822 | + | VC2087    | 2-oxoglutarate dehydrogenase E1                                                                                 |
| 2302696 | 2302723 | TAAATCGATTGGCAAGTTATTGATCAAA  | 2302657 | - | VC2149    | hypothetical protein                                                                                            |
| 2306486 | 2306513 | GGAACAGCAGCGCCAATCGTTGCCCAA   | 2306480 | - | VC2156*   | lipoprotein                                                                                                     |
| 2524108 | 2524135 | GGAACCTGAGAGTATTCGCTTGTCTGA   | 2524101 | - | VC2366    | ribonuclease activity regulator protein RraA                                                                    |
| 2613708 | 2613735 | TGAATTTTAGCGCAATATCTGGTCTTA   | 2613701 | - | VC2437    | pseudo                                                                                                          |
| 2649846 | 2649873 | TGAACCTTCTCGATAATGCCGAGTCTCT  | 2649839 | - | VC2467*,# | RNA polymerase sigma factor RpoE                                                                                |
| 2654232 | 2654259 | CACACTATTTTTGTTTAGGTTTTCTAT   | 2654270 | + | VC2473    | hypothetical protein                                                                                            |
| 2709569 | 2709596 | GGAACCTCACTGCTGGAGATTGCCAAA   | 2709603 | + | VC2524    | 3-deoxy-D-manno-octulosonate 8-phosphate phosphatase                                                            |
| 2812169 | 2812196 | TGAACCTTTGCTTAGAGCTCTGTCTAT   | 2812162 | - | VC2640    | <b>micV</b>                                                                                                     |
| 2908373 | 2908400 | GGAACCTATTGCCACATTGCCTCTCTAA  | 2908365 | - | VC2734    | general secretion pathway protein C                                                                             |

| NC_002506       |               |                               |              |            |               |                                             |
|-----------------|---------------|-------------------------------|--------------|------------|---------------|---------------------------------------------|
| Motif hit start | Motif hit end | Motif hit seq                 | TSS position | TSS strand | TSS locus tag | TSS gene product                            |
| 35140           | 35167         | GGCACCTTCTGCTCCTGCATCAGTCAAA  | 35174        | +          | VCA0027       | chitinase                                   |
| 67115           | 67142         | CAAATTTTTCCAGACAAATTTGCACT    | 67182        | +          | VCA0061       | DEAD%2FDEAH box helicase                    |
| 92487           | 92514         | TGAACAAGCTGTCACTCTCTATCAAA    | 92447        | -          | VCA0080       | diguanylate cyclase                         |
| 214685          | 214712        | GAAACTCATTGACAAAACGAACATCAAA  | 214667       | -          | VCA0198       | site-specific DNA-methyltransferase         |
| 357164          | 357191        | CAAACCTATTAGCTGTAGTGGTCAACTAA | 357233       | +          | VCA0370       | hypothetical protein                        |
| 400386          | 400413        | GGCAATTTAATGTCAAAAATTTATCAAA  | 400463       | +          | VCA0447       | hemagglutinin associated protein            |
| 424133          | 424160        | TAAACAAGAAGTCGATGAAGTTGTCGAA  | 424183       | +          | VCA0485       | MazG domain-containing protein              |
| 510200          | 510227        | GAAACTCACATTGAATGAACATATCATA  | 510193       | -          | VCA0572       | D-alanyl-alanine synthetase A               |
| 513961          | 513988        | CAACCTTATATTGATAAAGGTGAACATA  | 513940       | -          | VCA0575       | LysR family transcriptional regulator       |
| 524874          | 524901        | GAAACTCAAAGCCTATTTGAGAATCCAA  | 524866       | -          | VCA0588       | peptide ABC transporter ATP-binding protein |
| 921498          | 921525        | TGCCATTTTCGCTGAAAACTTGCCAT    | 921452       | -          | VCA0974       | methyl-accepting chemotaxis protein         |
| 929810          | 929837        | GGAATCCAAAGCCATTTGCTTAGTCCAT  | 929863       | +          | VCA0981       | hypothetical protein                        |
| 949359          | 949386        | TAAAATTTATCGATTGAAATTCATCAAA  | 949317       | -          | VCA0994       | hypothetical protein                        |
| 957852          | 957879        | TAAACTAACCGCTGATAAACTACTCAGA  | 957911       | +          | VCA1004       | hypothetical protein                        |

\*Listed as  $\sigma^E$ -dependent in *E. coli* K12, according to Ecocyc database (<https://ecocyc.org/>)

#Listed as  $\sigma^E$ -dependent in *E. coli* K12 (Rhodius *et al.*, 2006)

**Appendix Table S2:** Genes differentially regulated by either *micV* or *vrrA* pulse expression

| Gene           | Description <sup>#</sup>                        | Fold change*<br><i>micV</i> pulse | Fold change*<br><i>vrrA</i> pulse |
|----------------|-------------------------------------------------|-----------------------------------|-----------------------------------|
| <i>ompT</i>    | outer membrane protein OmpT                     | -22.38                            | -10.55                            |
| <i>vca0951</i> | hypothetical protein                            | -18.22                            | -12.25                            |
| <i>vc1743</i>  | hypothetical protein                            | -13.76                            | -8.61                             |
| <i>vca0966</i> | hypothetical protein                            | -6.82                             | -4.49                             |
| <i>rpoE</i>    | RNA polymerase sigma factor RpoE                | -6.50                             | -5.18                             |
| <i>rseA</i>    | sigma-E factor negative regulatory protein RseA | -6.33                             | -4.33                             |
| <i>vc1563</i>  | pseudogene                                      | -5.86                             | -8.13                             |
| <i>dsbA</i>    | thiol:disulfide interchange protein DsbA        | -5.81                             | -4.45                             |
| <i>rseB</i>    | sigma-E factor negative regulatory protein RseB | -5.15                             | -3.41                             |
| <i>rseC</i>    | sigma-E factor negative regulatory protein RseC | -5.08                             | -3.71                             |
| <i>vc1744</i>  | hypothetical protein                            | -4.82                             | -3.86                             |
| <i>tolC</i>    | outer membrane protein TolC                     | -4.54                             | -9.40                             |
| <i>vc2240</i>  | phenolic acid decarboxylase                     | -4.26                             | -3.02                             |
| <i>vc1566</i>  | putative ABC transport system permease          | -4.10                             | -5.47                             |
| <i>dsbD</i>    | thiol:disulfide interchange protein DsbD        | -3.74                             | -3.49                             |
| <i>vc1567</i>  | putative ABC transport system permease          | -3.53                             | -3.73                             |
| <i>vc1485</i>  | hypothetical protein                            | -3.38                             | -3.44                             |
| <i>ompA</i>    | outer membrane protein OmpA                     | -3.20                             | -10.29                            |
| <i>bamD</i>    | outer membrane protein assembly factor BamD     | -3.08                             | -2.69                             |
| <i>vc1568</i>  | ABC transporter ATP-binding protein             | -2.82                             | -3.78                             |
| <i>vca0447</i> | site-specific DNA-methyltransferase             | 2.21                              | 3.21                              |
| <i>vca0845</i> | hypothetical protein                            | 3.29                              | 2.72                              |
| <i>vca0789</i> | putative membrane protein                       | 3.65                              | 2.59                              |
| <i>pal</i>     | peptidoglycan-associated lipoprotein            | 1.11                              | -5.82                             |
| <i>lpp</i>     | major outer membrane lipoprotein                | -1.05                             | -5.47                             |
| <i>acfA</i>    | accessory colonization factor AcfA              | 1.26                              | -3.64                             |
| <i>vc0429</i>  | hypothetical protein                            | 1.24                              | -3.30                             |
| <i>prtV</i>    | immune inhibitor A, protease                    | -5.54                             | -1.31                             |
| <i>btuB</i>    | vitamin B12 transporter                         | -4.03                             | 1.24                              |
| <i>oppA</i>    | oligopeptide transport substrate-bind. protein  | -3.52                             | -1.17                             |
| <i>ushA</i>    | 5'-nucleotidase / UDP-sugar diphosphatase       | -3.49                             | 1.14                              |
| <i>ompU</i>    | outer membrane protein OmpU                     | -3.06                             | -1.18                             |

<sup>#</sup>Description is based on the annotation at KEGG (<https://www.genome.jp/kegg>)

\*Fold change is based on transcriptomic analysis of pBAD-derived *micV* or *vrrA* expression using RNA-seq. Genes with a fold-change of at least 3.0-fold in either condition and a FDR adjusted p-value  $\leq 1E-8$  were considered to be differentially expressed.

**Appendix Table S3: Bacterial strains used in this study**

| Strain                    | Relevant markers/ genotype                                                                                                                                                                                                                            | Reference/ source          |
|---------------------------|-------------------------------------------------------------------------------------------------------------------------------------------------------------------------------------------------------------------------------------------------------|----------------------------|
| <b><i>V. cholerae</i></b> |                                                                                                                                                                                                                                                       |                            |
| KPS-0014                  | C6706 Wild-type                                                                                                                                                                                                                                       | (Thelin & Taylor, 1996)    |
| KPS-0054                  | C6706 $\Delta hfq$                                                                                                                                                                                                                                    | (Svenningsen et al., 2009) |
| KPS-0995                  | C6706 <i>hfq::hfq-3XFLAG</i>                                                                                                                                                                                                                          | This study                 |
| KPVC-10072                | C6706 $\Delta vrrA$                                                                                                                                                                                                                                   | This study                 |
| KPVC-10075                | C6706 $\Delta micV \Delta vrrA$                                                                                                                                                                                                                       | This study                 |
| KPVC-10076                | C6706 $\Delta micV$                                                                                                                                                                                                                                   | This study                 |
| KPVC-10122                | C6706 <i>ompT::ompT-3xFLAG</i>                                                                                                                                                                                                                        | This study                 |
| KPVC-10124                | C6706 $\Delta micV \Delta vrrA \Delta ompT::ompT-3xFLAG$                                                                                                                                                                                              | This study                 |
| KPVC-10137                | C6706 $\Delta vrrA \Delta ompT::ompT-3xFLAG$                                                                                                                                                                                                          | This study                 |
| KPVC-10139                | C6706 $\Delta micV \Delta vrrA \Delta ompT::ompT-3xFLAG$                                                                                                                                                                                              | This study                 |
| KPVC-10814                | C6706 $\Delta vchM$                                                                                                                                                                                                                                   | This study                 |
| KPVC-10822                | C6706 $\Delta vchM \Delta rpoE$                                                                                                                                                                                                                       | This study                 |
| KPVC-10824                | C6706 $\Delta vchM \Delta rpoE \Delta vrrA$                                                                                                                                                                                                           | This study                 |
| KPVC-10826                | C6706 $\Delta vchM \Delta rpoE \Delta micV$                                                                                                                                                                                                           | This study                 |
| KPVC-10828                | C6706 $\Delta vchM \Delta rpoE \Delta vrrA \Delta micV$                                                                                                                                                                                               | This study                 |
| KPVC-12139                | C6706 $\Delta ompA$                                                                                                                                                                                                                                   | This study                 |
| KPVC-12143                | C6706 $\Delta vchM \Delta rpoE \Delta ompA$                                                                                                                                                                                                           | This study                 |
| KPVC-12203                | C6706 $\Delta micV \Delta vrrA \Delta ompA::ompA-3xFlag$                                                                                                                                                                                              | This study                 |
| KPVC-12647                | C6706 <i>ompA::ompA scr</i>                                                                                                                                                                                                                           | This study                 |
| KPVC-12651                | C6706 $\Delta vchM \Delta rpoE \Delta ompA::ompA scr$                                                                                                                                                                                                 | This study                 |
| <b><i>E. coli</i></b>     |                                                                                                                                                                                                                                                       |                            |
| BW25113                   | <i>lacI<sup>r</sup> rrrB<sub>T14</sub> <math>\Delta lacZ_{WJ16}</math> hsdR514 <math>\Delta araBAD_{AH33}</math> <math>\Delta rhaBAD_{LD78}</math> rph-1 <math>\Delta(araB-D)567 \Delta(rhaD-B)568 \Delta lacZ4787(::rrnB-3)</math> hsdR514 rph-1</i> | (Datsenko & Wanner, 2000)  |
| TOP10                     | F- <i>mcrA <math>\Delta(mrr-hsdRMS-mcrBC)</math> <math>\phi 80 lacZ \Delta M15 \Delta lacX74</math> nupG recA1 araD139 <math>\Delta(ara-leu)7697 galE15 galK16 rpsL(Str^R)</math> endA1 <math>\lambda</math></i>                                      | Invitrogen                 |
| S17 $\lambda$ pir         | $\Delta lacU169$ ( $\Phi lacZ \Delta M15$ ), <i>recA1, endA1, hsdR17, thi-1, gyrA96, relA1, <math>\lambda</math>pir</i>                                                                                                                               | (Simon et al., 1983)       |
| ECA101                    | <i>E. coli</i> BW25113 $\Delta rpoE$                                                                                                                                                                                                                  | (Egler et al., 2005)       |
| KPEC-52214                | BW25113 <i>ompA::kan<sup>R</sup></i>                                                                                                                                                                                                                  | (Baba et al., 2006)        |
| KPEC-52215                | BW25113 <i>ompC::kan<sup>R</sup></i>                                                                                                                                                                                                                  | (Baba et al., 2006)        |

**Appendix Table S4:** Plasmids used in this study

| Plasmid trivial name                   | Plasmid stock name- | Relevant fragment                 | Comment                                            | Origin, marker           | Reference                        |
|----------------------------------------|---------------------|-----------------------------------|----------------------------------------------------|--------------------------|----------------------------------|
| pBAD1K-Ctr                             | pMD004              |                                   | Control plasmid                                    | p15A, Kan <sup>R</sup>   | Papenfort lab plasmid collection |
| pBAD1K- <i>micV</i>                    | pNP016              | <i>P<sub>BAD</sub>-micV</i>       | <i>micV</i> expression plasmid                     | p15A, Kan <sup>R</sup>   | This study                       |
| pBAD1K- <i>rpoE</i>                    | pNP018              | <i>P<sub>BAD</sub>-rpoE</i>       | <i>rpoE</i> expression plasmid                     | p15A, Kan <sup>R</sup>   | This study                       |
| pBAD1K- <i>vrrA</i>                    | pNP022              | <i>P<sub>BAD</sub>-vrrA</i>       | <i>vrrA</i> expression plasmid                     | p15A, Kan <sup>R</sup>   | This study                       |
| pBAD5A                                 | pKP8-35             | empty                             | Control plasmid                                    | pBR322, Amp <sup>R</sup> | (Papenfort et al., 2006)         |
| pBAD5A- <i>rpoE</i> ( <i>E.c.</i> )    | pKP142-2            | <i>rpoE</i> ( <i>E.coli</i> )     | <i>rpoE</i> expression plasmid                     | pBR322, Amp <sup>R</sup> | (Papenfort et al., 2010)         |
| pBAD5A- <i>rpoE</i> ( <i>V.c.</i> )    | pRH011              | <i>rpoE</i> ( <i>V.cholerae</i> ) | <i>rpoE</i> expression plasmid                     | pBR322, Amp <sup>R</sup> | This study                       |
| pCMW-1C                                | pCtr                |                                   | Promotorless plasmid for transcriptional reporters | p15A, Cm <sup>R</sup>    | (Herzog et al., 2019)            |
| pCMW-1C- <i>mKATE2</i>                 | pYH-010             | <i>mKATE2</i>                     | Promoterless plasmid for transcriptional reporters | p15A, Cm <sup>R</sup>    | (Herzog et al., 2019)            |
| pCMW-1C- <i>PmicV::mKate2</i>          | pNP074              | <i>PmicV::mKATE2</i>              | Transcriptional reporter <i>PmicV::mKATE2</i>      | p15A, Cm <sup>R</sup>    | This study                       |
| pCMW-1C- <i>PvrrA::mKate2</i>          | pNP075              | <i>PvrrA::mKATE2</i>              | Transcriptional reporter <i>PvrrA::mKATE2</i>      | p15A, Cm <sup>R</sup>    | This study                       |
| pCMW-1K                                | pCtr                |                                   | Control plasmid                                    | p15A, Kan <sup>R</sup>   | Papenfort lab plasmid collection |
| pCMW-1K- <i>PmicV::gfp</i>             | pNP017              | <i>PmicV::gfp</i>                 | Transcriptional reporter <i>PmicV::gfp</i>         | p15A, Kan <sup>R</sup>   | This study                       |
| pEVS143-1K                             |                     | <i>Ptac</i> promoter              | Constitutive over-expression plasmid               | p15A, Kan <sup>R</sup>   | (Dunn et al., 2006)              |
| pEVS143-1C                             |                     | <i>Ptac</i> promoter              | Constitutive over-expression plasmid               | p15A, Cm <sup>R</sup>    | Papenfort lab plasmid collection |
| pEVS- <i>micV</i>                      | pNP002              | <i>micV</i>                       | <i>micV</i> expression plasmid                     | p15A, kan <sup>R</sup>   | This study                       |
| pEVS- <i>micV</i> M1                   | pRG001              | <i>micV</i> M1                    | <i>micV</i> M1 expression plasmid                  | p15A, Kan <sup>R</sup>   | This study                       |
| pEVS- <i>P<sub>L</sub>-rybB</i>        | pMD030              | <i>rybB</i>                       | <i>rybB</i> expression plasmid                     | p15A, Cm <sup>R</sup>    | This study                       |
| pEVS- <i>P<sub>L</sub>-rybB</i>        | pMD251              | <i>rybB</i>                       | <i>rybB</i> expression plasmid                     | p15A, Kan <sup>R</sup>   | This study                       |
| pEVS- <i>P<sub>L</sub>-rybBΔ9</i>      | pNP088              | <i>rybBΔ9</i>                     | <i>rybBΔ9</i> expression plasmid                   | p15A, Kan <sup>R</sup>   | This study                       |
| pEVS- <i>P<sub>L</sub>-sRNA</i> var.01 | pMD241              | <i>sRNA</i> var.1                 | <i>sRNA</i> var.1 expression plasmid               | p15A, Kan <sup>R</sup>   | This study                       |
| pEVS- <i>P<sub>L</sub>-sRNA</i> var.02 | pMD242              | <i>sRNA</i> var.2                 | <i>sRNA</i> var.2 expression plasmid               | p15A, Kan <sup>R</sup>   | This study                       |
| pEVS- <i>P<sub>L</sub>-sRNA</i> var.03 | pMD243              | <i>sRNA</i> var.3                 | <i>sRNA</i> var.3 expression plasmid               | p15A, Kan <sup>R</sup>   | This study                       |

|                                   |        |                               |                                      |                        |                            |
|-----------------------------------|--------|-------------------------------|--------------------------------------|------------------------|----------------------------|
| pEVS-P <sub>L</sub> -sRNA var.04  | pMD244 | sRNA var.4                    | sRNA var.4 expression plasmid        | p15A, Kan <sup>R</sup> | This study                 |
| pEVS-P <sub>L</sub> -sRNA var.05  | pMD245 | sRNA var.5                    | sRNA var.5 expression plasmid        | p15A, Kan <sup>R</sup> | This study                 |
| pEVS-P <sub>L</sub> -sRNA var.06  | pMD246 | sRNA var.6                    | sRNA var.6 expression plasmid        | p15A, Kan <sup>R</sup> | This study                 |
| pEVS-P <sub>L</sub> -sRNA var.07  | pMD247 | sRNA var.7                    | sRNA var.7 expression plasmid        | p15A, Kan <sup>R</sup> | This study                 |
| pEVS-P <sub>L</sub> -sRNA var.08  | pMD248 | sRNA var.8                    | sRNA var.8 expression plasmid        | p15A, Kan <sup>R</sup> | This study                 |
| pEVS-P <sub>L</sub> -sRNA var.09  | pMD249 | sRNA var.9                    | sRNA var.9 expression plasmid        | p15A, Kan <sup>R</sup> | This study                 |
| pEVS-P <sub>L</sub> -sRNA var.10  | pMD250 | sRNA var.10                   | sRNA var.10 expression plasmid       | p15A, Kan <sup>R</sup> | This study                 |
| pEVS-P <sub>L</sub> -sRNA var.11  | pMD251 | sRNA var.11                   | sRNA var.11 expression plasmid       | p15A, Kan <sup>R</sup> | This study                 |
| pEVS-P <sub>L</sub> -sRNA var.12  | pMD252 | sRNA var.12                   | sRNA var.12 expression plasmid       | p15A, Kan <sup>R</sup> | This study                 |
| pEVS-P <sub>L</sub> -sRNA var.13  | pMD253 | sRNA var.13                   | sRNA var.13 expression plasmid       | p15A, Kan <sup>R</sup> | This study                 |
| pEVS-P <sub>L</sub> -sRNA var.14  | pMD254 | sRNA var.14                   | sRNA var.14 expression plasmid       | p15A, Kan <sup>R</sup> | This study                 |
| pEVS-P <sub>L</sub> -sRNA var.15  | pMD255 | sRNA var.15                   | sRNA var.15 expression plasmid       | p15A, Kan <sup>R</sup> | This study                 |
| pEVS-P <sub>L</sub> -sRNA library |        | sRNA 9nt variants             | sRNA library expression plasmid      | p15A, Cm <sup>R</sup>  | This study                 |
| pEVS-rybB                         | pRH013 | rybB                          | rybB expression plasmid              | p15A, Kan <sup>R</sup> | This study                 |
| pEVS-vrrA                         | pRH001 | vrrA                          | vrrA expression plasmid              | p15A, kan <sup>R</sup> | This study                 |
| pEVS-vrrA M1                      | pRG002 | vrrA M1                       | vrrA M1 expression plasmid           | p15A, Kan <sup>R</sup> | This study                 |
| pEVS-vrrA M2                      | pRG004 | vrrA M2                       | vrrA M2 expression plasmid           | p15A, Kan <sup>R</sup> | This study                 |
| pKAS32                            | pKAS32 |                               | suicide plasmid for allelic exchange | R6K, Amp <sup>R</sup>  | (Skorupski & Taylor, 1996) |
| pKAS32-hfq::3xFLAG                | pKP431 | hfq::3xFLAG                   | hfq::3xFLAG allelic replacement      | R6K, Amp <sup>R</sup>  | This study                 |
| pKAS32-ompA::3xFLAG               | pNP089 | ompA::3xFLAG                  | ompA::3xFLAG allelic replacement     | R6K, Amp <sup>R</sup>  | This study                 |
| pKAS32-ompA                       | pNP090 | ompA                          | ompA region                          | R6K, Amp <sup>R</sup>  | This study                 |
| pKAS32-ompA scr                   | pNP091 | ompA scr                      | ompA scr allelic replacement         | R6K, Amp <sup>R</sup>  | This study                 |
| pKAS32-ompT::3xFLAG               | pNP021 | ompT::3xFLAG                  | ompT::3xFLAG allelic replacement     | R6K, Amp <sup>R</sup>  | This study                 |
| pKAS32-ΔmicV                      | pNP024 | up-/downstream flanks of micV | suicide plasmid for micV knock-out   | R6K, Amp <sup>R</sup>  | This study                 |
| pKAS32-ΔompA                      | pEE001 | up-/downstream flanks of ompA | suicide plasmid for ompA knock-out   | R6K, Amp <sup>R</sup>  | This study                 |

|                               |          |                                      |                                                     |                          |                                  |
|-------------------------------|----------|--------------------------------------|-----------------------------------------------------|--------------------------|----------------------------------|
| pKAS32- $\Delta$ <i>rpoE</i>  | pNP023   | up-/downstream flanks of <i>rpoE</i> | suicide plasmid for <i>rpoE</i> knock-out           | R6K, Amp <sup>R</sup>    | This study                       |
| pKAS32- $\Delta$ <i>vchM</i>  | pNP076   | up-/downstream flanks of <i>vchM</i> | suicide plasmid for <i>vchM</i> knock-out           | R6K, Amp <sup>R</sup>    | This study                       |
| pKAS32- $\Delta$ <i>vrrA</i>  | pNP026   | up-/downstream flanks of <i>vrrA</i> | suicide plasmid for <i>vrrA</i> knock-out           | R6K, Amp <sup>R</sup>    | This study                       |
| P <sub>L</sub> - <i>rybB</i>  | pFM1-1   | P <sub>L</sub> - <i>rybB</i>         | <i>rybB</i> expression plasmid                      | ColE1, Amp <sup>R</sup>  | (Bouvier et al., 2008)           |
| pXG10-1C                      | pXG10-1C | ' <i>lacZ::gfp</i>                   | template plasmid for translational reporters        | pSC101*, Cm <sup>R</sup> | Papenfort lab plasmid collection |
| pXG10-1C- <i>acfA::gfp</i>    | pNP059   | <i>acfA::gfp</i>                     | Translational reporter <i>acfA::gfp</i>             | pSC101*, Cm <sup>R</sup> | This study                       |
| pXG10-1C- <i>bamD::gfp</i>    | pNP082   | <i>bamD::gfp</i>                     | Translational reporter <i>bamD::gfp</i>             | pSC101*, Cm <sup>R</sup> | This study                       |
| pXG10-1C- <i>btuB::gfp</i>    | pNP029   | <i>btuB::gfp</i>                     | Translational reporter <i>btuB::gfp</i>             | pSC101*, Cm <sup>R</sup> | This study                       |
| pXG10-1C- <i>dsbD::gfp</i>    | pNP079   | <i>dsbD::gfp</i>                     | Translational reporter <i>dsbD::gfp</i>             | pSC101*, Cm <sup>R</sup> | This study                       |
| pXG10-1C- <i>lpp</i> M2       | pNP087   | <i>lpp</i> M2*:: <i>gfp</i>          | Translational reporter <i>lpp</i> M2*:: <i>gfp</i>  | pSC101*, Cm <sup>R</sup> | This study                       |
| pXG10-1C- <i>lpp::gfp</i>     | pNP086   | <i>lpp::gfp</i>                      | Translational reporter <i>lpp::gfp</i>              | pSC101*, Cm <sup>R</sup> | This study                       |
| pXG10-1C- <i>ompA::gfp</i>    | pNP081   | <i>ompA::gfp</i>                     | Translational reporter <i>ompA::gfp</i>             | pSC101*, Cm <sup>R</sup> | This study                       |
| pXG10-1C- <i>ompT</i> M1      | pRG009   | <i>ompT</i> M1*:: <i>gfp</i>         | Translational reporter <i>ompT</i> M1*:: <i>gfp</i> | pSC101*, Cm <sup>R</sup> | This study                       |
| pXG10-1C- <i>ompT::gfp</i>    | pKP465   | <i>ompT::gfp</i>                     | Translational reporter <i>ompT::gfp</i>             | pSC101*, Cm <sup>R</sup> | This study                       |
| pXG10-1C- <i>ompU::gfp</i>    | pNP085   | <i>ompU::gfp</i>                     | Translational reporter <i>ompU::gfp</i>             | pSC101*, Cm <sup>R</sup> | This study                       |
| pXG10-1C- <i>oppA::gfp</i>    | pNP084   | <i>oppA::gfp</i>                     | Translational reporter <i>oppA::gfp</i>             | pSC101*, Cm <sup>R</sup> | This study                       |
| pXG10-1C- <i>pal::gfp</i>     | pNP062   | <i>pal::gfp</i>                      | Translational reporter <i>pal::gfp</i>              | pSC101*, Cm <sup>R</sup> | This study                       |
| pXG10-1C- <i>prvT::gfp</i>    | pNP083   | <i>prvT::gfp</i>                     | Translational reporter <i>prvT::gfp</i>             | pSC101*, Cm <sup>R</sup> | This study                       |
| pXG10-1C- <i>rpoE::gfp</i>    | pNP044   | <i>rpoE::gfp</i>                     | Translational reporter <i>rpoE::gfp</i>             | pSC101*, Cm <sup>R</sup> | This study                       |
| pXG10-1C- <i>ushA</i> M1      | pRG008   | <i>ushA</i> M1*:: <i>gfp</i>         | Translational reporter <i>ushA</i> M1*:: <i>gfp</i> | pSC101*, Cm <sup>R</sup> | This study                       |
| pXG10-1C- <i>ushA::gfp</i>    | pNP054   | <i>ushA::gfp</i>                     | Translational reporter <i>ushA::gfp</i>             | pSC101*, Cm <sup>R</sup> | This study                       |
| pXG10-1C- <i>vc1485::gfp</i>  | pNP080   | <i>vc1485::gfp</i>                   | Translational reporter <i>vc1485::gfp</i>           | pSC101*, Cm <sup>R</sup> | This study                       |
| pXG10-1C- <i>vc1563::gfp</i>  | pNP078   | <i>vc1563::gfp</i>                   | Translational reporter <i>vc1563::gfp</i>           | pSC101*, Cm <sup>R</sup> | This study                       |
| pXG10-1C- <i>vca0951::gfp</i> | pNP077   | <i>vca0951::gfp</i>                  | Translational reporter <i>vca0951::gfp</i>          | pSC101*, Cm <sup>R</sup> | This study                       |
| pXG10-SF                      | pXG10SF  | ' <i>lacZ::gfp</i>                   | template plasmid for translational reporters        | PSC101*, Cm <sup>R</sup> | (Corcoran et al., 2012)          |

**Appendix Table S5: DNA oligonucleotides used in this study**

| ID       | Sequence (5'→3'); P denotes a monophosphate                       | Description           |
|----------|-------------------------------------------------------------------|-----------------------|
| KPO-0012 | GCAGATCGAACTGGAAGCT                                               | pKP431                |
| KPO-0019 | CGAGATTATCGATCTTATTCA                                             | pKP431                |
| KPO-0066 | TATCATGATCTTTATAATCACCGTCATGGTCTTTGTAGTCCTCTTCAGACTTC<br>TCTGCTGG | pKP431                |
| KPO-0067 | GATCATGATATCGACTACAAAGATGACGATAAATAGTTCTTTGCACAATTATT<br>TAAGGAG  | pKP431                |
| KPO-0092 | CCACACATTATACGAGCCGA                                              | pNP002, pRH001/013    |
| KPO-0148 | GTTTTTGGTACCATCCCAATGATCCACAAAGA                                  | pKP431                |
| KPO-0149 | GTTTTTCTAGGAAACAGTCTCTACCGCTTGG                                   | pKP431                |
| KPO-0196 | GGAGAAACAGTAGAGAGTTGCG                                            | pNP016/018/022        |
| KPO-0236 | GGCGTACACAAGTATAGGAGT                                             | VrrA oligoprobe       |
| KPO-0243 | TTCGTTTCACTTCTGAGTTCGG                                            | 5S rRNA oligoprobe    |
| KPO-0267 | TAATAGGCCTAGGATGCATATG                                            | pNP026/076/089, pEE01 |
| KPO-0268 | CGTTAACAAACCGGTACCTCTA                                            | pNP026/076/089, pEE01 |
| KPO-0282 | CACTGACACCCTCATCAGTG                                              | pMD241-255            |
| KPO-0640 | P-TTTTACCGCGACACCGTGCC                                            | pNP16                 |
| KPO-0820 | GGCCTTCTAGAGTCTTCTAAGAA                                           | MicV oligoprobe       |
| KPO-0999 | P-ACCACTGCTTTTTCTTAGAAGAC                                         | pNP002/016            |
| KPO-1000 | GTTTTTCTAGAGGATTAGAACCCGAATTAAGT                                  | pNP002                |
| KPO-1023 | GTTTTTCTAGAGGATCCGGTGATTGATTGAG                                   | pRH001/013, pNP002    |
| KPO-1064 | GTTTTTATGCATGAATCTAATGGCGGTGGTG                                   | pKP465                |
| KPO-1065 | GTTTTTGCTAGCAGCTGCGTTTACAGAGCCT                                   | pKP465                |
| KPO-1082 | P-GTGATTGACAGAGCTTTGAGA                                           | pRH001                |
| KPO-1083 | GTTTTTCTAGATCGCCAATGAACCGACTTG                                    | pRH001                |
| KPO-1180 | GCTTATTTGGAGATGTTTGAGC                                            | pNP024                |
| KPO-1181 | AGAGCTCTAAGCAAAAGGTTTCAT                                          | pNP024                |
| KPO-1182 | AACCTTTTGCTTAGAGCTCTTGCGTAGCAGAAAGTTTAATTCG                       | pNP024                |
| KPO-1183 | ACCAAATCCCCTGCTGTCAT                                              | pNP024                |
| KPO-1184 | GTTTTTGGTACCCTAGCGGTTTAAACACCTCA                                  | pNP024                |
| KPO-1185 | GTTTTTCTAGGAGATCAAGGACGCATTGCCG                                   | pNP024                |
| KPO-1186 | TCAATCGTAAAAGGCTCGACAC                                            | pNP023                |
| KPO-1187 | GAAGGTAGGGGAATAACAATATTCGGTAATGACTATGGTGAATAG                     | pNP023                |
| KPO-1188 | ATTGTTATCCCCTACCTTCTC                                             | pNP023                |
| KPO-1189 | TTATCTTCAGTGATCAAATCCAGC                                          | pNP023                |
| KPO-1214 | GTTTTTGGTACCTTCATCACCGCGGGATC                                     | pNP023                |
| KPO-1215 | GTTTTTCTAGGTTATCTTGCAAGGACGTCTGC                                  | pNP023                |
| KPO-1235 | GTTTTTGTGCGACTGCTCTCAGCAAGCTCAAGC                                 | pNP017/074            |
| KPO-1236 | GTTTTTGCATGCGTGGTACAGTAATAGACAGAG                                 | pNP017/074            |
| KPO-1237 | GTTTTTGGTACCGGATTAGAACCCGAATTAAGT                                 | pNP016                |
| KPO-1324 | AGAGGTACCGGTTGTTAACGGATAATGGTGCAGCTTGGTG                          | pNP026                |
| KPO-1325 | ATGAACCGACTTGAACCTTTCAGACTGGGCGTTTG                               | pNP026                |
| KPO-1326 | GTTCAAGTCGGTTCATTGG                                               | pNP026                |
| KPO-1327 | TATGCATCCTAGGCCTATTAGGTGTAGATAAAGCAAGTTTC                         | pNP026                |
| KPO-1397 | GATCCGGTGATTGATTGAGC                                              | pNP018/022            |
| KPO-1398 | CGCAACTCTCTACTGTTTCTCCTAGGGGAATAACAATAGGAGTG                      | pNP018                |
| KPO-1399 | GCTCAATCAATCACCGGATCACCATAGTCATTACGGAATTTGC                       | pNP018                |

|          |                                                    |                        |
|----------|----------------------------------------------------|------------------------|
| KPO-1409 | TCGTATAATGTGTGGGCCACTGCTTTTCTTTGATGTC              | pRH013                 |
| KPO-1410 | ACCGGATCCTCTAGAGGTTGAGAGGGTTGCAGGG                 | pRH013                 |
| KPO-1417 | TAGAGGTACCGGTTGTTAACGCAAAGATTGGAAAACCACCTTC        | pNP021                 |
| KPO-1418 | CCAGTAGATACGAGCACCGA                               | pNP021                 |
| KPO-1419 | GATCTCGAACACGTTTATTGAG                             | pNP021                 |
| KPO-1420 | CATATGCATCCTAGGCCTATTAGAAGAGCGCTCTCGATTTTC         | pNP021                 |
| KPO-1421 | TCGGTGCTCGTATCTACTGGGACTACAAAGACCATGACGGTG         | pNP021                 |
| KPO-1422 | CTCAATAAACGTGTTTCGAGATCTTACTATTTATCGTCATCTTTGTAGTC | pNP021                 |
| KPO-1423 | TCTAGATTAAATCAGAACGCAGAAG                          | pRH011                 |
| KPO-1424 | GGAGAAACAGTAGAGAGTTGC                              | pRH011                 |
| KPO-1425 | GCAACTCTCTACTGTTTCTCCTAGGGGAATAACAATAGGAGTG        | pRH011                 |
| KPO-1426 | GCGTTCTGATTTAATCTAGAACCATAGTCATTACGGAATTTGC        | pRH011                 |
| KPO-1478 | CGCAACTCTCTACTGTTTCTCCGTGATTGACAGAGCTTTGAGA        | pNP022                 |
| KPO-1479 | GCTCAATCAATCACCGGATCTCGCCAATGAACCGACTTG            | pNP022                 |
| KPO-1491 | CTTTCGTCTTCACCTCGAGAATTGTGAGCGGATAACAATTGAC        | synthetic sRNA library |
| KPO-1492 | GATAAAACGAAAGGCCAGTCTTTCGACTGAGCCTTTTCG            | synthetic sRNA library |
| KPO-1505 | GTTTTTTAATACGACTCACTATAGGGAGGGCACTGCGAGTGCTAATAGAG | <i>ompT</i> riboprobe  |
| KPO-1506 | GGTGACCAAACAAAGAGTTGG                              | <i>ompT</i> riboprobe  |
| KPO-1525 | GCGGCCCTCTCACTTCC                                  | pMD241-255             |
| KPO-1529 | GGAAGTGAGAGGGCCGCGGCAAAGCCGTTTTTCCATAG             | pMD241-255             |
| KPO-1660 | GTTTTTATGCATATGACCTATACCGTCCGC                     | pMD241-255             |
| KPO-1681 | GTTTTTATGCATGTTATGCAGTGGTATTGCAC                   | pNP029                 |
| KPO-1682 | GTTTTTGCTAGCGGTAAGCAGCGATGCTAGA                    | pNP029                 |
| KPO-1683 | GTTTTTATGCATAAGTTTTATCCGCACTCCAAG                  | pNP054                 |
| KPO-1684 | GTTTTTGCTAGCAATGGCTGCACTGAGGAC                     | pNP054                 |
| KPO-1702 | ATGCATGTGCTCAGTATCTCTATC                           | pNP081/084/085         |
| KPO-1703 | GCTAGCGGATCCGCTGG                                  | pNP081/084/085         |
| KPO-1704 | GAGATACTGAGCACATGCATACGAAAATGGCTGAGCCATC           | pNP085                 |
| KPO-1712 | GAGATACTGAGCACATGCATATGATTGCTAATGTGTGCCGCA         | pNP084                 |
| KPO-1716 | GAGATACTGAGCACATGCATGCGGTGAAACCAAGCGTTTAAAC        | pNP062                 |
| KPO-1717 | GAGCCAGCGGATCCGCTAGCTGGTAGCGCAATCAGCAGAC           | pNP062                 |
| KPO-1718 | GAGATACTGAGCACATGCATAATAAAATGTGAAACACAGGTAAAAATAG  | pNP059                 |
| KPO-1719 | GAGCCAGCGGATCCGCTAGCCGGTCTGCTGATTTGCTGATAAAG       | pNP059                 |
| KPO-1826 | GAGCCAGCGGATCCGCTAGCAGCAAAAAGTAACGTCGCTGAA         | pNP081                 |
| KPO-1831 | GAGATACTGAGCACATGCATGACAAAAAGGTGATCTGGCTC          | pNP081                 |
| KPO-1840 | GTTTTTATGCATGCTCATGCAAGTAGTGGTGTC                  | pNP044                 |
| KPO-1841 | GTTTTTGCTAGCCTGAACTCGCTCAATCAACAC                  | pNP044                 |
| KPO-1846 | GTGTGTATGGAAGGCCCTAATC                             | <i>ushA</i> qRT-PCR    |
| KPO-1847 | CACTCGTAAGCTTGAACAATGTAAG                          | <i>ushA</i> qRT-PCR    |
| KPO-1850 | TGCCGAGAGAAAGACAAATC                               | <i>oppA</i> qRT-PCR    |
| KPO-1851 | ACCCATCATCATCACGAAGTAAG                            | <i>oppA</i> qRT-PCR    |
| KPO-1852 | CTGAGCAAGAAGTGAAGAACAAG                            | <i>pal</i> qRT-PCR     |
| KPO-1853 | AGCTAGCATTGCTTCGTAGTC                              | <i>pal</i> qRT-PCR     |
| KPO-2193 | AGAGGTACCGGTTGTTAACGCACTGTCTGATGAACTGATCTTC        | pNP076                 |
| KPO-2194 | TGAAGCATGTAAAAAGGGAGTTAACTGTATCACCATACTACCTC       | pNP076                 |
| KPO-2195 | CTCCCTTTTTACATGCTTCACAG                            | pNP076                 |
| KPO-2196 | TATGCATCCTAGGCCTATTACGATCTTTGCGTTGATATTCAGG        | pNP076                 |
| KPO-2297 | GTCTGATGCACTACACGATTCT                             | <i>ompT</i> qRT-PCR    |
| KPO-2298 | GCTAGCTCTTGCTTTGCATTATC                            | <i>ompT</i> qRT-PCR    |



|          |                                           |                        |
|----------|-------------------------------------------|------------------------|
| KPO-2311 | GACCACTCGTTTTCTTAGAAGACTCTAAGAAGG         | pRG001                 |
| KPO-2312 | TCTAAGAAAAACGAGTGGTCCCACACATTATACG        | pRG001                 |
| KPO-2313 | CAATTACGCTCGTTTTCTTTTTATTAACCTATAG        | pRG002                 |
| KPO-2314 | AGGAAAAACGAGCGTAATTGGTGACAGCG             | pRG002                 |
| KPO-2315 | CTATAGAAGTGTACGCCCAAAGCCAGATTG            | pRG004                 |
| KPO-2316 | CTTTGGGCGTACACTTCTATAGGAGTTAATAAAAAAG     | pRG004                 |
| KPO-2378 | GGTAACCCAGAACTACCACTG                     | <i>recA</i> qRT-PCR    |
| KPO-2379 | CACCACTTCTTCGCCTTCTT                      | <i>recA</i> qRT-PCR    |
| KPO-2418 | CAACGAGTGGTTTTCATCAGTTCAAAGGTATGAC        | pRG008                 |
| KPO-2419 | GAAGTATGAAAACCACTCGTTGAAATGTCGTTG         | pRG008                 |
| KPO-2426 | CCATATTAAGAAAAGCGAGTGGATTAAC              | pRG009                 |
| KPO-2427 | CACTCGCTTTTCTTAATATGGGAATTCC              | pRG009                 |
| KPO-2503 | GTTTTTGCATGCCAAGCGATTAACATCACATTTTCTCG    | pNP075                 |
| KPO-2504 | GTTTTTGTGACGTCTATTCAGACTGGGCGTTTG         | pNP075                 |
| KPO-3328 | GATGCGGTTGATTGGCTTAAA                     | <i>vca0447</i> qRT-PCR |
| KPO-3329 | CCGTGTAGTCGTACCTATTTGTC                   | <i>vca0447</i> qRT-PCR |
| KPO-3330 | TTCAGGGTAAAGTGGCTTTG                      | <i>vca0845</i> qRT-PCR |
| KPO-3331 | GCGAGCAGCAGACTAAAGAT                      | <i>vca0845</i> qRT-PCR |
| KPO-3332 | GACCGCTATGTCTTGATGTT                      | <i>vca0789</i> qRT-PCR |
| KPO-3333 | GTGTAGAGCCGATCAAGGTATT                    | <i>vca0789</i> qRT-PCR |
| KPO-3334 | CAACAACGCATGCCCAATAC                      | <i>vc1743</i> qRT-PCR  |
| KPO-3335 | GGAGCCATTCGAGCATTTCTA                     | <i>vc1743</i> qRT-PCR  |
| KPO-3336 | CCAAGCAAAGATCTGACCAAAG                    | <i>vca0966</i> qRT-PCR |
| KPO-3337 | CGCGTATTTCTTCACGCTTATG                    | <i>vca0966</i> qRT-PCR |
| KPO-3338 | GAAGCCATTCTTGGTGCTAAC                     | <i>vca0951</i> qRT-PCR |
| KPO-3339 | TCTCGTTCATAAGTGCCAGAG                     | <i>vca0951</i> qRT-PCR |
| KPO-3340 | GTTTTTATGCATGTTTTTTGAACTTTCCTTATCATCC     | pNP078                 |
| KPO-3341 | GTTTTTGTAGCTGAAGACTCAGGGTATAAGTG          | pNP078                 |
| KPO-3346 | GTTTTTATGCATTACTATCACCGGTAATGATTAATC      | pNP079                 |
| KPO-3347 | GTTTTTGTAGCGTTATTGCCAGCGTTATTACCAA        | pNP079                 |
| KPO-3348 | GTTTTTATGCATGAACTTGAAGCTCTCCGCAA          | pNP080                 |
| KPO-3349 | GTTTTTGTAGCCATCACTTGGTAGAGTGCCG           | pNP080                 |
| KPO-3350 | GTTTTTATGCATACATCAAAAACATCCCTTGAGGAA      | pNP077                 |
| KPO-3351 | GTTTTTGTAGCGTTAGCACCAAGAATGGCTTC          | pNP077                 |
| KPO-3360 | GTTTTTATGCATACTAGTATGGAAAAATACGCCGAC      | pNP082                 |
| KPO-3361 | GTTTTTGTAGCGCAACCAAATAACAGGGATAACG        | pNP082                 |
| KPO-3362 | GTTTTTATGCATAAATACTTTACATATGGATATGTAATATG | pNP083                 |
| KPO-3363 | GTTTTTGTAGCGCCTAAATCAATGGGTGTTGAG         | pNP083                 |
| KPO-3364 | GTTTTTATGCATGTCCATATTTAATTTTCGATAAGTATAG  | pNP086                 |
| KPO-3365 | GTTTTTGTAGCTGCAGTGGTAGCTTCATCAGG          | pNP086                 |
| KPO-3418 | CCAGCGGATCCGCTAGCAACATTCGCTGCAAAAGAGGTG   | pNP084                 |
| KPO-3419 | CCAGCGGATCCGCTAGCAGCGTAAGCGCCAGTAGC       | pNP085                 |
| KPO-3420 | AGCGTCTCCGTACTTCTACT                      | <i>lpp</i> qRT-PCR     |
| KPO-3421 | GCTGACCTGAGTGCTGATTT                      | <i>lpp</i> qRT-PCR     |
| KPO-3422 | CAGTGTACCCGAAAGTGTAGAT                    | <i>ompU</i> qRT-PCR    |
| KPO-3423 | CTGTTGACGCAATGGGTAATG                     | <i>ompU</i> qRT-PCR    |
| KPO-3424 | CTGAACTGGATGACTGGCTTAC                    | <i>vc1565</i> qRT-PCR  |
| KPO-3425 | CCACTTTGACTCTGCTGCTTAG                    | <i>vc1565</i> qRT-PCR  |
| KPO-3426 | CCAATTCGCTGCCTTTGATTAC                    | <i>prtT</i> qRT-PCR    |

|          |                                                 |                          |
|----------|-------------------------------------------------|--------------------------|
| KPO-3427 | CCTGTGTAAGGGTGTTCATATTC                         | <i>prvT</i> qRT-PCR      |
| KPO-3428 | AAACGGCGCACCATAGAA                              | <i>dsbA</i> qRT-PCR      |
| KPO-3429 | CGTAAGCCACCGAAAGATGA                            | <i>dsbA</i> qRT-PCR      |
| KPO-3464 | CCTCGTAACTCAAGCCATCAA                           | <i>rpoE</i> qRT-PCR      |
| KPO-3465 | ATCGAACCCGGAGAACATTAC                           | <i>rpoE</i> qRT-PCR      |
| KPO-3466 | CATCACGGTACGCTTCCATAA                           | <i>vc2240</i> qRT-PCR    |
| KPO-3467 | GCATGGTGCCATTTACTTTCC                           | <i>vc2240</i> qRT-PCR    |
| KPO-3468 | GTAATCATTGACCGAAGGTGAG                          | <i>dsbD</i> qRT-PCR      |
| KPO-3469 | AGGCAGCGGAACAGATAAAG                            | <i>dsbD</i> qRT-PCR      |
| KPO-3470 | TTCCATGCACGGGTATATAAGG                          | <i>vc1485</i> qRT-PCR    |
| KPO-3471 | GACGTGACAACGTATCGTAGAA                          | <i>vc1485</i> qRT-PCR    |
| KPO-3472 | CTGGAATTCAGGGATCACTAGC                          | <i>ompA</i> qRT-PCR      |
| KPO-3473 | CAGCTAAAGGTCTAGGCGAAAG                          | <i>ompA</i> qRT-PCR      |
| KPO-3474 | GTGCTGACCTTCACCTTCTT                            | <i>vc0429</i> qRT-PCR    |
| KPO-3475 | GCTCGACAATCTGCTCTAACT                           | <i>vc0429</i> qRT-PCR    |
| KPO-3478 | CGAAGCACAACCTCAAGAAAC                           | <i>btuB</i> qRT-PCR      |
| KPO-3479 | TCGATATCTTGGCGGGTAATG                           | <i>btuB</i> qRT-PCR      |
| KPO-3480 | CTCCAGCGTTACCCAAACA                             | <i>bamD</i> qRT-PCR      |
| KPO-3481 | AGAAATCTGCGGTGCTAAA                             | <i>bamD</i> qRT-PCR      |
| KPO-3484 | TTTAGGCTAACAGCGTCACTT                           | <i>acfA</i> qRT-PCR      |
| KPO-3485 | GCAAATGCAGCACCGTATATT                           | <i>acfA</i> qRT-PCR      |
| KPO-3562 | CCTTCTTAAGGAGTTCTCTATGAAC                       | pNP087                   |
| KPO-3563 | CTTAAGAAGGTAAGTCGGTGTTATTG                      | pNP087                   |
| KPO-4040 | AGAGGTACCGGTTGTTAACGCACTGCTAAACCATGACTCAAG      | pEE001                   |
| KPO-4041 | CATCAAGATTCAATCTACAAAGGC                        | pEE001                   |
| KPO-4042 | TTGTAGATTGAATCTTGATGAGCCTTTCGGTTATTATTTTGTCCAC  | pEE001                   |
| KPO-4043 | TATGCATCCTAGGCCTATTAGTGCAATGATCTTGGGTGATG       | pEE001                   |
| KPO-4110 | AGAGGTACCGGTTGTTAACGGGAAATACCATGAAAAAGCTAGC     | pNP089                   |
| KPO-4111 | TTCAGTAACTTGGTACTGGAATTC                        | pNP089                   |
| KPO-4112 | TCCAGTACCAAGTTACTGAAGACTACAAAGACCATGACGGTG      | pNP089                   |
| KPO-4113 | ATCTTGATGATTACCGTAAATTACTATTTATCGTCATCTTTGTAGTC | pNP089                   |
| KPO-4114 | TTTACGGTAATCATCAAGATTCAATC                      | pNP089                   |
| KPO-4115 | TATGCATCCTAGGCCTATTAACCATGACTCAAGTCCATGC        | pNP089                   |
| KPO-4308 | GTGCTCAGTATCTTGTTATCCGCTC                       | pNP088                   |
| KPO-4309 | GATAACAAGATACTGAGCACTTTCTTTGATGTCCCCATTTTGTGGAG | pNP088                   |
| KPO-4356 | GCTCCACAAAATGGGGAC                              | rybB-scaffold oligoprobe |
| KPO-4962 | AGAGGTACCGGTTGTTAACGCACTCGATTTTGTATCACCAG       | pNP090                   |
| KPO-4963 | TATGCATCCTAGGCCTATTAGTGCAATGATCTTGGGTGATG       | pNP090                   |
| KPO-5122 | ATTATAGCAGCAAATTTCTTCATGGTATTTCTTTTTCTTTATG     | pNP091                   |
| KPO-5123 | GAAGAAATTGGCTGCTATAATTTACGCGACGTTACTTTTTGC      | pNP091                   |

## APPENDIX SUPPLEMENTARY MATERIALS AND METHODS

### Plasmid construction

The plasmids used in this study are listed in Table S4, used DNA oligonucleotides are listed in Table S5. The plasmids pNP074, pNP075 and pNP017 were obtained by amplification of the promoter regions of *micV* and *vrrA* from KPS-0014 chromosomal DNA, using the oligonucleotides KPO-1235/1236 and KPO-2503/2504, respectively. The promoter inserts were digested using SphI and Sall restriction enzymes and ligated into an equally treated pYH010 backbone (pNP074, pNP075) or a pCMW-1K backbone (pNP017). The inserts for the sRNA expression plasmids pRH001, pRH013 and pNP002 were obtained by amplification with KPO-1082/1083, KPO-1409/1410 or KPO-0999/1000, respectively. Fragments were introduced into linearized pEVS plasmid backbones (KPO-0092/1023) using XbaI restriction (pRH001, pNP002) and ligation, or Gibson assembly (pRH013). The plasmid pRH011 was generated via Gibson assembly using linearized pBAD5A backbone (KPO-1423/1424) and a KPO-1425/1426 amplified *rpoE* insert, obtained from KPS-0014 chromosomal DNA. The *micV*, *vrrA* and *rpoE* fragments were PCR amplified from KPS-0014 chromosomal DNA using the primer pairs KPO-0999/1237, KPO-1398/1399 or KPO-1478/1479, respectively. KpnI restriction of the *micV* fragment and a KPO-0196/0640 linearized pBAD5K backbone, yielded pNP016. Gibson assembly of the *vrrA* and *rpoE* fragments with KPO-0196/1397 linearized pBAD5K backbone yielded pNP022 and pNP018, respectively. Plasmid pKP431 was cloned by PCR amplification of the *hfq* flanking regions with KPO-0012/0066 and KPO-0019/0067, thereby introducing the 3xFLAG tag with primer overhangs. The resulting fragments were fused via overlap PCR using KPO-0148/0149, and introduced into pKAS32 backbone using KpnI and AvrII restriction sites. The plasmids pNP023 and pNP024 were constructed by amplification of insert fragments using KPO-1186/1187 and KPO-1188/1189, or KPO-1180/1181 and KPO-1182/1183, respectively. The inserts were fused using overlap PCR with the oligonucleotides KPO-1214/125 (pNP023) or KPO-1184/1185 (pNP024), digested with KpnI and AvrII and ligated into an equally digested pKAS32 backbone. The plasmids pNP026, pNP076, pEE001, pNP021 and pNP089 were constructed by Gibson assembly, using a KPO-0267/0268 linearized pKAS32 backbone. The insert fragments were PCR amplified from KPS-0014 chromosomal DNA using the following oligonucleotides: pNP021 (KPO-1324/1325 and KPO-1326/1327), pNP076 (KPO-2193/2194 and KPO-2195/2196), pEE001 (KPO-4040/4041, KPO-4042/4043), pNP021 (KPO-1417/1418, KPO-1419/1420 and KPO-1421/1422 amplified from KPS-0995 chromosomal DNA), pNP089 (KPO-4110/4111, KPO-4114/4115 and KPO-4112/4113 amplified from KPS-0995 chromosomal DNA). GFP fusions were cloned as described previously (Corcoran et al., 2012) and employing previously determined transcriptional start site annotations (Papenfort et al., 2015). Briefly, *acfA* (pNP059), *bamD* (pNP082), *btuB* (pNP029), *dsbD* (pNP079), *lpp* (pNP086), *ompA* (pNP081), *ompT* (pKP465),

*ompU* (pNP085), *oppA* (pNP084), *pal* (pNP062), *prvT* (pNP083), *rpoE* (pNP044), *ushA* (pNP054), *vc1485* (pNP080), *vc1563* (pNP078), *vca0951* (pNP077) inserts for translational reporters were PCR amplified using the primers indicated in Table S6 and introduced into pXG10-1C backbones using NheI, NsiI restriction sites or Gibson assembly. The pMD030 plasmid was constructed by restriction digest of pFM1-1 with XbaI and XhoI, yielding the P<sub>L</sub>-*rybB* fragment and insertion into an equally treated pEVS backbone. pNP088 was obtained by site-directed mutagenesis PCR using KPO-4308/4309 and the parental plasmid pMD251 as a template. pMD241-255 plasmids were obtained by sequencing plasmids derived from EtOH resistant colonies. The Cm<sup>R</sup> resistance cassettes were replaced with Kan<sup>R</sup> cassettes using linearization with KPO-0282/1529 and amplification of the Kan<sup>R</sup> cassette from the pCMW-1K plasmid using KPO-1160/1525. The plasmid pNP089 was generated by amplification of the insert from KPS-0014 chromosomal DNA using KPO-4962/4963 and Gibson assembly with KPO-0267/0268 linearized pKAS32 backbone. Quickchange PCR using pNP090 as template, and KPO-5122/5123 yielded pNP091. Mutations for compensatory base pair exchanges were introduced using the oligonucleotides listed in Table S5, and the respective parental plasmids as a template.

#### **V. cholerae strain construction**

A complete list of strains used in this study is provided in Table S3. *V. cholerae* C6706 was used as the wild-type strain in this study. *V. cholerae* mutant strains were generated as described previously (Papenfort et al., 2017). RK2/RP4-based conjugal transfer was used to introduce plasmids into *V. cholerae* from *E. coli* S17 $\lambda$ pir plasmid donor strains. Subsequently, transconjugants were selected using appropriate antibiotics, and polymyxin B to specifically inhibit *E. coli* growth.

#### **Identification of $\sigma^E$ -dependent promoters in *V. cholerae***

To detect  $\sigma^E$ -dependent promoters in *V. cholerae*, the promoter sequence of 60  $\sigma^E$ -dependent genes of *E. coli* (Mutalik et al., 2009) were used to construct a motif with MEME (Bailey et al., 2015). The motif was searched with FIMO (Bailey et al., 2015) in the genome sequence of *V. cholerae* (Accession NC\_002505, NC\_002506) accepting only hits with a p-value below 0.0001. The 626 motif matching sites in *V. cholerae* were filtered by proximity to transcription start site (Papenfort et al., 2015) and only those with a maximal distance of 50 nt were reported in Table S1. A Unix shell script that represents the analyses has been deposited at Zenodo (<https://doi.org/10.5281/zenodo.2543422>)

### ***In silico* analyses**

Genomic loci encoding *micV* in various *Vibrio* strains were analyzed for gene synteny using SyntTax (Fig. EV1A) (Oberto, 2013). The following strains were used for analysis: *V.ch.*, *Vibrio cholerae* (NCBI:txid243277); *V.vu.*, *Vibrio vulnificus* (NCBI:txid914127); *V.co.*, *Vibrio coralliilyticus* (NCBI:txid1384040); *V.tu.*, *Vibrio tubiashii* (NCBI:txid1051646); *V.ha.*, *Vibrio harveyi* (ATCC:33843); *V.an.*, *Vibrio anguillarum* (NCBI:txid882102); *V.al.*, *Vibrio alginolyticus* (NCBI:txid1219076). To generate the alignment of *micV* sequences (Fig. 1A), the following strains were used: *Vch*, *Vibrio cholerae* (NCBI:txid243277); *Vfu*, *Vibrio furnissii* (NCBI:txid903510); *Vvu*, *Vibrio vulnificus* (NCBI:txid216895); *Van*, *Vibrio anguillarum* (NCBI:txid882102); *Vsp*, *Vibrio splendidus* (NCBI:txid575788); *Vex*, *Vibrio* sp. Ex25 (NCBI:txid150340); *Vpa*, *Vibrio parahaemolyticus* (NCBI:txid223926); *Vej*, *Vibrio* sp. EJY3 (NCBI:txid1116375); *Asa*, *Aliivibrio salmonicida* (NCBI:txid316275); *Afi*, *Aliivibrio fischeri* (NCBI:txid312309). To generate the alignment of *vrpA* sequences (Fig. EV2A), the following strains were used: *Vch*, *Vibrio cholerae* (NCBI:txid243277); *Vco*, *Vibrio coralliilyticus* (NCBI:txid1384040); *Vvu*, *Vibrio vulnificus* (NCBI:txid672); *Val*, *Vibrio alginolyticus* (NCBI:txid1219076); *Vsp*, *Vibrio splendidus* (NCBI:txid575788).

### **APPENDIX SUPPLEMENTARY REFERENCES**

- Baba T, Ara T, Hasegawa M, Takai Y, Okumura Y, Baba M, Datsenko KA, Tomita M, Wanner BL, Mori H (2006) Construction of Escherichia coli K-12 in-frame, single-gene knockout mutants: the Keio collection. *Mol Syst Biol* 2: 2006 0008
- Bailey TL, Johnson J, Grant CE, Noble WS (2015) The MEME Suite. *Nucleic Acids Res* 43: W39-49
- Bouvier M, Sharma CM, Mika F, Nierhaus KH, Vogel J (2008) Small RNA binding to 5' mRNA coding region inhibits translational initiation. *Mol Cell* 32: 827-37
- Chao Y, Papenfort K, Reinhardt R, Sharma CM, Vogel J (2012) An atlas of Hfq-bound transcripts reveals 3' UTRs as a genomic reservoir of regulatory small RNAs. *EMBO J* 31: 4005-19
- Corcoran CP, Podkaminski D, Papenfort K, Urban JH, Hinton JC, Vogel J (2012) Superfolder GFP reporters validate diverse new mRNA targets of the classic porin regulator, MicF RNA. *Mol Microbiol* 84: 428-45
- Datsenko KA, Wanner BL (2000) One-step inactivation of chromosomal genes in Escherichia coli K-12 using PCR products. *Proc Natl Acad Sci U S A* 97: 6640-5
- Dunn AK, Millikan DS, Adin DM, Bose JL, Stabb EV (2006) New rfp- and pES213-derived tools for analyzing symbiotic *Vibrio fischeri* reveal patterns of infection and lux expression in situ. *Appl Environ Microbiol* 72: 802-10
- Egler M, Grosse C, Grass G, Nies DH (2005) Role of the extracytoplasmic function protein family sigma factor RpoE in metal resistance of Escherichia coli. *J Bacteriol* 187: 2297-307
- Herzog R, Peschek N, Fröhlich KS, Schumacher K, Papenfort K (2019) Three autoinducer molecules act in concert to control virulence gene expression in *Vibrio cholerae*. *Nucleic Acids Research*: gky1320-gky1320
- Mutalik VK, Nonaka G, Ades SE, Rhodius VA, Gross CA (2009) Promoter strength properties of the complete sigma E regulon of Escherichia coli and Salmonella enterica. *J Bacteriol* 191: 7279-87

Oberto J (2013) SyntTax: a web server linking synteny to prokaryotic taxonomy. *BMC Bioinformatics* 14: 4

Papenfort K, Bouvier M, Mika F, Sharma CM, Vogel J (2010) Evidence for an autonomous 5' target recognition domain in an Hfq-associated small RNA. *Proc Natl Acad Sci U S A* 107: 20435-40

Papenfort K, Forstner KU, Cong JP, Sharma CM, Bassler BL (2015) Differential RNA-seq of *Vibrio cholerae* identifies the VqmR small RNA as a regulator of biofilm formation. *Proc Natl Acad Sci U S A* 112: E766-75

Papenfort K, Pfeiffer V, Mika F, Lucchini S, Hinton JC, Vogel J (2006) SigmaE-dependent small RNAs of *Salmonella* respond to membrane stress by accelerating global omp mRNA decay. *Mol Microbiol* 62: 1674-88

Papenfort K, Silpe JE, Schramma KR, Cong JP, Seyedsayamdost MR, Bassler BL (2017) A *Vibrio cholerae* autoinducer-receptor pair that controls biofilm formation. *Nat Chem Biol* 13: 551-557

Simon R, Priefer U, Pühler A (1983) A Broad Host Range Mobilization System for In Vivo Genetic Engineering: Transposon Mutagenesis in Gram Negative Bacteria. *Bio/Technology* 1: 784

Skorupski K, Taylor RK (1996) Positive selection vectors for allelic exchange. *Gene* 169: 47-52

Svenningsen SL, Tu KC, Bassler BL (2009) Gene dosage compensation calibrates four regulatory RNAs to control *Vibrio cholerae* quorum sensing. *EMBO J* 28: 429-39

Thelin KH, Taylor RK (1996) Toxin-coregulated pilus, but not mannose-sensitive hemagglutinin, is required for colonization by *Vibrio cholerae* O1 El Tor biotype and O139 strains. *Infect Immun* 64: 2853-6
