# Supplementary material for: A conserved RNA seed‐pairing domain directs small RNA‐mediated stress resistance in enterobacteria
Source: PubMed Central journal article supplement — EMBO J. 2019 Jul 17;38(16):e101650. doi: 10.15252/embj.2019101650 (PMC6694218; doi:10.15252/embj.2019101650), 2019-07-17
Supplement: EMBJ-38-e101650-s003.pdf [file EMBJ-38-e101650-s003.pdf]

# Source Data Fig.1

## Fig. 1B

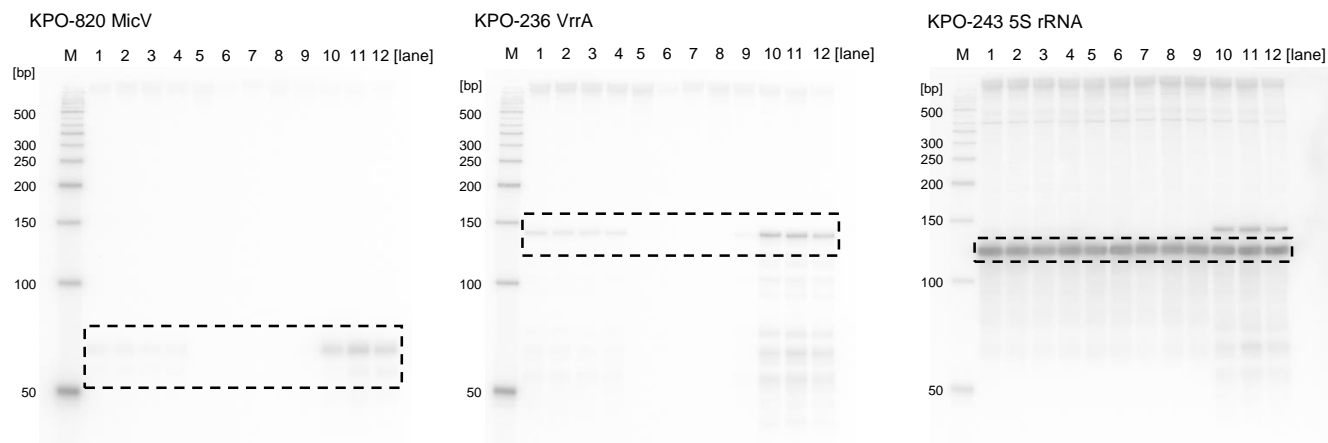

## Fig. 1C:

Data are: (fluorescence / OD600) - autofluorescence

| OD600         | OD 0.5 |       |       | OD 1.0 |       |       | OD 2.0 |       |       | OD 2+6h |        |        | OD 2+18h |        |        |
|---------------|--------|-------|-------|--------|-------|-------|--------|-------|-------|---------|--------|--------|----------|--------|--------|
|               | Rep1   | Rep2  | Rep3  | Rep1   | Rep2  | Rep3  | Rep1   | Rep2  | Rep3  | Rep1    | Rep2   | Rep3   | Rep1     | Rep2   | Rep3   |
| WT            | 467.5  | 401.6 | 381.1 | 96.8   | 99.7  | 94.6  | 228.6  | 226.4 | 245.0 | 1930.5  | 2143.5 | 2431.5 | 6951.8   | 7579.1 | 6526.3 |
| $\Delta$ vchM | 969.9  | 939.7 | 826.2 | 332.9  | 326.1 | 275.5 | 290.1  | 66.7  | 272.3 | 2373.8  | 2246.9 | 2354.0 | 6571.9   | 4455.7 | 5414.8 |
| $\Delta$ rpoE | 322.1  | 289.0 | 176.8 | 12.6   | 13.4  | 10.4  | 72.7   | 65.4  | 60.2  | 17.5    | 13.2   | 12.8   | 6.3      | 6.5    | 7.4    |

## Figs.1D,E

### Fig.1D upper panel

Data are: (fluorescence / OD600) - autofluorescence

| PmicV | WT      |         |         | PmicV | $\Delta$ rpoE |        |        |
|-------|---------|---------|---------|-------|---------------|--------|--------|
|       | Rep1    | Rep2    | Rep3    |       | Rep1          | Rep2   | Rep3   |
| mock  | 11644.9 | 12242.3 | 12510.9 | mock  | 3976.8        | 3589.8 | 3515.6 |
| EtOH  | 60144.7 | 57984.0 | 84521.3 | EtOH  | 3159.7        | 2445.0 | 2527.1 |

### Fig.1E upper panel

Data are: (fluorescence / OD600) - autofluorescence

| PvrrA | WT       |          |          | PvrrA | $\Delta$ rpoE |        |        |
|-------|----------|----------|----------|-------|---------------|--------|--------|
|       | Rep1     | Rep2     | Rep3     |       | Rep1          | Rep2   | Rep3   |
| mock  | 27842.2  | 25345.5  | 27980.3  | mock  | 4313.7        | 3858.8 | 3592.3 |
| EtOH  | 168036.8 | 113919.0 | 140539.4 | EtOH  | 2266.7        | 2078.0 | 2263.3 |

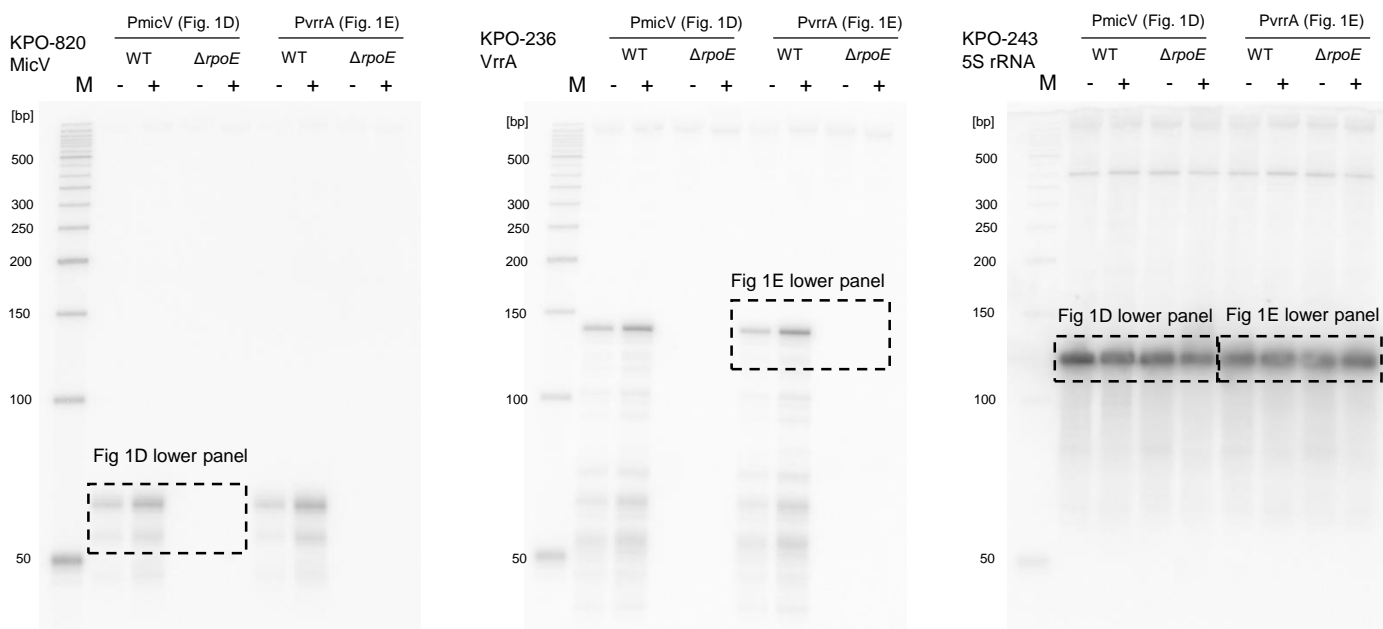

Source Data Fig.1

Fig. 1F

|      | WT pCtr       |       | $\Delta micV$ pCtr |       | $\Delta vrrA$ pCtr |       | $\Delta micV \Delta vrrA$ pCtr |       |
|------|---------------|-------|--------------------|-------|--------------------|-------|--------------------------------|-------|
|      | CFU/ml        | log10 | CFU/ml             | log10 | CFU/ml             | log10 | CFU/ml                         | log10 |
| Rep1 | 3916666666.67 | 9.59  | 2108333333.33      | 9.32  | 475000000.00       | 8.68  | 291666666.67                   | 8.46  |
| Rep2 | 3300000000.00 | 9.52  | 3206250000.00      | 9.51  | 304166666.67       | 8.48  | 320833333.33                   | 8.51  |
| Rep3 | 2820833333.33 | 9.45  | 4450000000.00      | 9.65  | 316666666.67       | 8.50  | 337500000.00                   | 8.53  |
| Rep4 | 3420833333.33 | 9.53  | 2170833333.33      | 9.34  | 204166666.67       | 8.31  | 762500000.00                   | 8.88  |
| Rep5 | 3983333333.33 | 9.60  | 2212500000.00      | 9.34  | 504166666.67       | 8.70  | 187500000.00                   | 8.27  |
| Rep6 | 3266666666.67 | 9.51  | 2112500000.00      | 9.32  | 258333333.33       | 8.41  | 179166666.67                   | 8.25  |
| Rep7 | 2041666666.67 | 9.31  | 2329166666.67      | 9.37  | 150000000.00       | 8.18  | 325000000.00                   | 8.51  |
| Rep8 | 2308333333.33 | 9.36  | 2466666666.67      | 9.39  | 441666666.67       | 8.65  | 212500000.00                   | 8.33  |

Dataset 1: Related to Fig. 1F

**Normality Test (Kolmogorov-Smirnov):** Passed (P = 0.508)

**Equal Variance Test (Brown-Forsythe):** Passed (P = 0.387)

| Group Name                | N | Missing | Mean  | Std Dev | SEM    |
|---------------------------|---|---------|-------|---------|--------|
| WT                        | 8 | 0       | 9.485 | 0.104   | 0.0368 |
| $\Delta micV$             | 8 | 0       | 9.405 | 0.115   | 0.0406 |
| $\Delta vrrA$             | 8 | 0       | 8.488 | 0.186   | 0.0656 |
| $\Delta vrrA \Delta micV$ | 8 | 0       | 8.468 | 0.201   | 0.0710 |

| Source of Variation | DF | SS    | MS    | F       | P      |
|---------------------|----|-------|-------|---------|--------|
| Between Groups      | 3  | 7.510 | 2.503 | 101.282 | <0.001 |
| Residual            | 28 | 0.692 | 0.025 |         |        |
| Total               | 31 | 8.202 |       |         |        |

The differences in the mean values among the treatment groups are greater than would be expected by chance; there is a statistically significant difference (P = <0.001).

Power of performed test with alpha = 0.050: 1.000

All Pairwise Multiple Comparison Procedures (Holm-Sidak method):  
Overall significance level = 0.05

| Comparison                                  | Diff of Means | t      | P      | P<0.050 |
|---------------------------------------------|---------------|--------|--------|---------|
| WT vs. $\Delta vrrA \Delta micV$            | 1.017         | 12.939 | <0.001 | Yes     |
| WT vs. $\Delta vrrA$                        | 0.997         | 12.685 | <0.001 | Yes     |
| $\Delta micV$ vs. $\Delta vrrA \Delta micV$ | 0.937         | 11.921 | <0.001 | Yes     |
| $\Delta micV$ vs. $\Delta vrrA$             | 0.917         | 11.668 | <0.001 | Yes     |
| WT vs. $\Delta micV$                        | 0.080         | 1.017  | 0.535  | No      |
| $\Delta vrrA$ vs. $\Delta vrrA \Delta micV$ | 0.020         | 0.253  | 0.802  | No      |
