# Supplementary material for: A conserved RNA seed‐pairing domain directs small RNA‐mediated stress resistance in enterobacteria
Source: PubMed Central journal article supplement — EMBO J. 2019 Jul 17;38(16):e101650. doi: 10.15252/embj.2019101650 (PMC6694218; doi:10.15252/embj.2019101650), 2019-07-17
Supplement: EMBJ-38-e101650-s004.pdf [file EMBJ-38-e101650-s004.pdf]

# Source Data Fig.2

## Fig. 2A

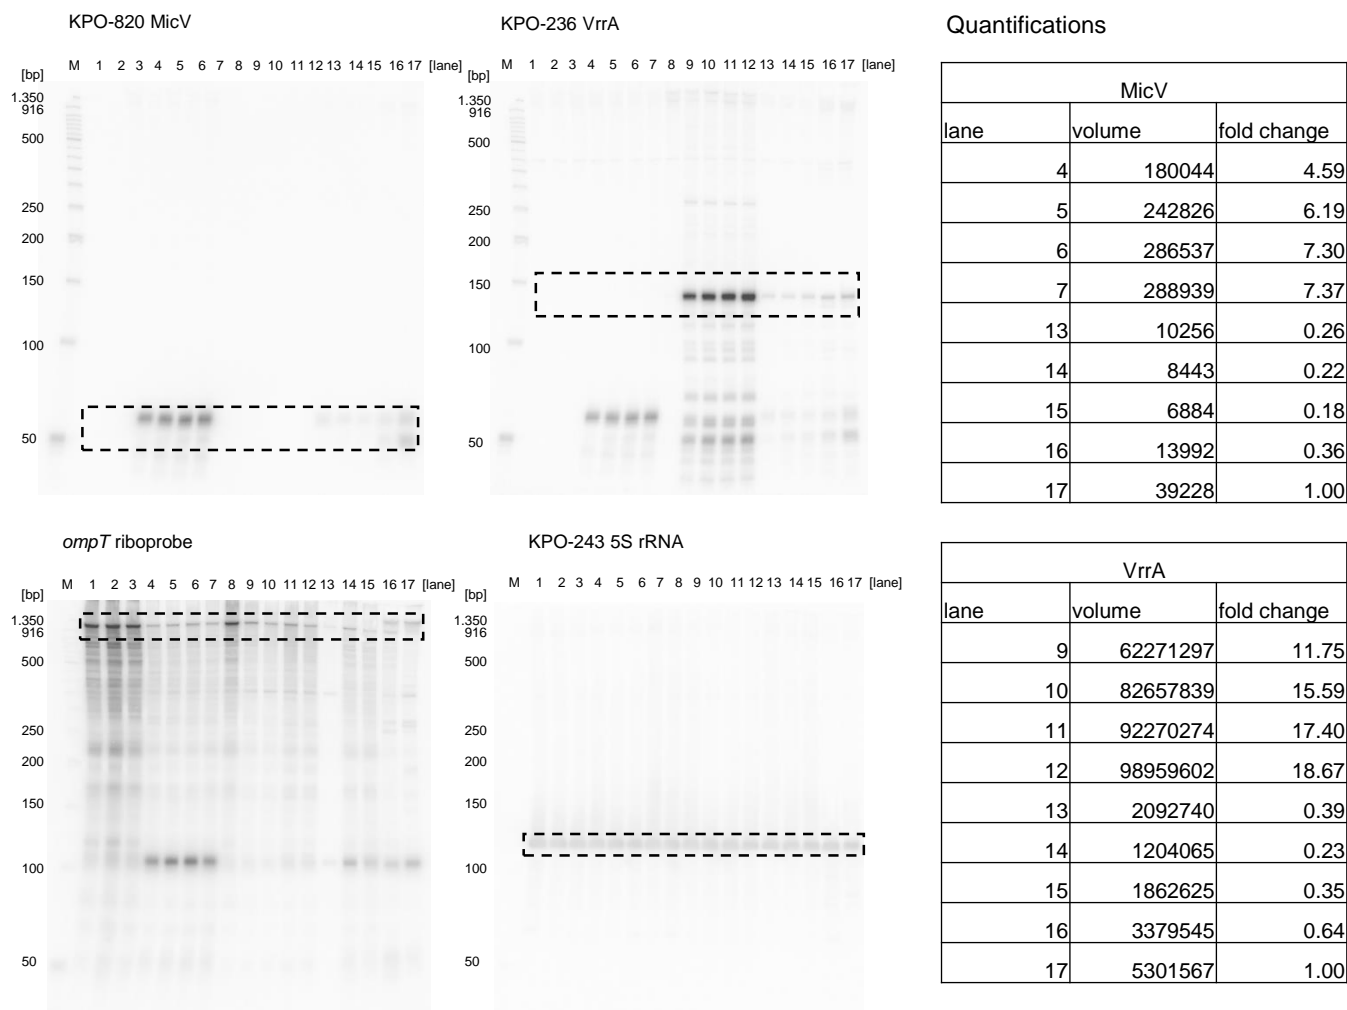

## Fig. 2C

Data are: (fluorescence / OD600) - autofluorescence

|             |                | pCtr   |        |        | pMicV  |        |        | pVrrA  |        |        |
|-------------|----------------|--------|--------|--------|--------|--------|--------|--------|--------|--------|
|             |                | Rep1   | Rep2   | Rep3   | Rep1   | Rep2   | Rep3   | Rep1   | Rep2   | Rep3   |
|             | <i>vc1563</i>  | 169453 | 169252 | 154780 | 36991  | 38042  | 38376  | 28567  | 28633  | 28142  |
| <i>dsbD</i> | <i>vc2701</i>  | 153291 | 157913 | 149433 | 62509  | 58704  | 58106  | 50978  | 50659  | 44447  |
|             | <i>vca0951</i> | 168188 | 187121 | 195697 | 71636  | 68500  | 71281  | 84240  | 87539  | 68743  |
| <i>bamD</i> | <i>vc0708</i>  | 132204 | 135567 | 130688 | 46385  | 44932  | 50290  | 39601  | 39424  | 38834  |
|             | <i>vc1485</i>  | 343180 | 375747 | 356960 | 103015 | 114013 | 107012 | 171158 | 171054 | 169861 |
| <i>rpoE</i> | <i>vc2467</i>  | 138830 | 132953 | 139851 | 41386  | 45771  | 42892  | 95328  | 91962  | 103609 |
| <i>ompA</i> | <i>vc2213</i>  | 155679 | 151465 | 136106 | 107227 | 87374  | 106327 | 74706  | 82275  | 74390  |
| <i>ompT</i> | <i>vc1854</i>  | 15276  | 13949  | 15711  | 1617   | 1567   | 1936   | 5517   | 5881   | 4093   |

## Source Data Fig.2

### Fig. 2D

Data are: (fluorescence / OD600) - autofluorescence

|       |         | pCtr   |        |        | pMicV |       |       | pVrrA  |        |        |
|-------|---------|--------|--------|--------|-------|-------|-------|--------|--------|--------|
|       |         | Rep1   | Rep2   | Rep3   | Rep1  | Rep2  | Rep3  | Rep1   | Rep2   | Rep3   |
| prtV  | vca0223 | 196819 | 210516 | 199923 | 29517 | 30263 | 29797 | 171790 | 180358 | 188300 |
| oppA  | vc1091  | 200657 | 203178 | 213661 | 23248 | 22548 | 23459 | 190924 | 199216 | 196746 |
| ompU  | vc0633  | 227108 | 230204 | 227038 | 88199 | 86310 | 80804 | 191885 | 199431 | 178114 |
| btuB2 | vc156   | 3097   | 3056   | 3335   | 879   | 880   | 863   | 2852   | 3097   | 3411   |
| ushA  | vc2174  | 14800  | 15033  | 15361  | 5726  | 5705  | 4905  | 14939  | 15103  | 14725  |

### Fig. 2E

Data are: (fluorescence / OD600) - autofluorescence

|      |         | pCtr   |        |        | pMicV  |        |        | pVrrA  |        |        |
|------|---------|--------|--------|--------|--------|--------|--------|--------|--------|--------|
|      |         | Rep1   | Rep2   | Rep3   | Rep1   | Rep2   | Rep3   | Rep1   | Rep2   | Rep3   |
| lpp  | vca0059 | 166133 | 154594 | 167690 | 164917 | 167673 | 154715 | 112224 | 124541 | 114840 |
| pal  | vc1835  | 74399  | 69480  | 78427  | 72430  | 69575  | 77921  | 23595  | 23525  | 26883  |
| acfA | vc844   | 73862  | 56510  | 85978  | 60967  | 66226  | 65939  | 16582  | 14432  | 16074  |
