# Supplementary material for: A conserved RNA seed‐pairing domain directs small RNA‐mediated stress resistance in enterobacteria
Source: PubMed Central journal article supplement — EMBO J. 2019 Jul 17;38(16):e101650. doi: 10.15252/embj.2019101650 (PMC6694218; doi:10.15252/embj.2019101650), 2019-07-17
Supplement: EMBJ-38-e101650-s005.pdf [file EMBJ-38-e101650-s005.pdf]

## Source Data Fig.3

Fig. 3D

|                 | pCtr  |       |       | pMicV |       |       | pMicV M1 |       |       |
|-----------------|-------|-------|-------|-------|-------|-------|----------|-------|-------|
|                 | Rep1  | Rep2  | Rep3  | Rep1  | Rep2  | Rep3  | Rep1     | Rep2  | Rep3  |
| <i>ompT</i>     | 15276 | 13949 | 15711 | 1617  | 1567  | 1936  | 21846    | 23265 | 23238 |
| <i>ompT</i> M1* | 57962 | 48100 | 55686 | 66772 | 63760 | 67946 | 3058     | 3002  | 2981  |

Fig. 3E

|                 | pCtr  |       |       | pMicV |       |       | pMicV M1 |       |       |
|-----------------|-------|-------|-------|-------|-------|-------|----------|-------|-------|
|                 | Rep1  | Rep2  | Rep3  | Rep1  | Rep2  | Rep3  | Rep1     | Rep2  | Rep3  |
| <i>ushA</i>     | 23318 | 22097 | 15897 | 8109  | 6292  | 7141  | 26022    | 25257 | 18520 |
| <i>ushA</i> M1* | 31485 | 33601 | 37931 | 29049 | 24034 | 28678 | 15528    | 17913 | 18428 |

Fig. 3F

|                | pCtr  |       |       | pVrrA |       |       | pVrrA M2 |       |       |
|----------------|-------|-------|-------|-------|-------|-------|----------|-------|-------|
|                | Rep1  | Rep2  | Rep3  | Rep1  | Rep2  | Rep3  | Rep1     | Rep2  | Rep3  |
| <i>lpp</i>     | 90596 | 81903 | 82948 | 57108 | 58277 | 59334 | 84573    | 78322 | 84671 |
| <i>lpp</i> M2* | 59576 | 63822 | 55660 | 52255 | 54564 | 58286 | 9933     | 9817  | 10051 |

Fig. 3G

| rpoE pulse<br>[min] | WT    |       | $\Delta$ vrrA |       | $\Delta$ micV |       | $\Delta$ vrrA $\Delta$ micV |       |
|---------------------|-------|-------|---------------|-------|---------------|-------|-----------------------------|-------|
|                     | mean  | SD    | mean          | SD    | mean          | SD    | mean                        | SD    |
| 0'                  | 1.000 | 0.000 | 1.000         | 0.000 | 1.000         | 0.000 | 1.000                       | 0.000 |
| 5'                  | 0.100 | 0.021 | 0.100         | 0.018 | 0.126         | 0.054 | 0.568                       | 0.187 |
| 10'                 | 0.114 | 0.028 | 0.087         | 0.016 | 0.087         | 0.005 | 0.289                       | 0.085 |
| 15'                 | 0.120 | 0.040 | 0.098         | 0.022 | 0.077         | 0.013 | 0.177                       | 0.043 |

Fig. 3H

| rpoE pulse<br>[min] | WT    |       | $\Delta$ vrrA |       | $\Delta$ micV |       | $\Delta$ vrrA $\Delta$ micV |       |
|---------------------|-------|-------|---------------|-------|---------------|-------|-----------------------------|-------|
|                     | mean  | SD    | mean          | SD    | mean          | SD    | mean                        | SD    |
| 0'                  | 1.000 | 0.000 | 1.000         | 0.000 | 1.000         | 0.000 | 1.000                       | 0.000 |
| 5'                  | 0.471 | 0.099 | 0.469         | 0.086 | 0.656         | 0.159 | 0.745                       | 0.174 |
| 10'                 | 0.290 | 0.029 | 0.380         | 0.041 | 0.584         | 0.121 | 0.548                       | 0.132 |
| 15'                 | 0.307 | 0.044 | 0.387         | 0.036 | 0.426         | 0.100 | 0.396                       | 0.180 |

Fig. 3I

| rpoE pulse<br>[min] | WT    |       | $\Delta$ vrrA |       | $\Delta$ micV |       | $\Delta$ vrrA $\Delta$ micV |       |
|---------------------|-------|-------|---------------|-------|---------------|-------|-----------------------------|-------|
|                     | mean  | SD    | mean          | SD    | mean          | SD    | mean                        | SD    |
| 0'                  | 1.000 | 0.000 | 1.000         | 0.000 | 1.000         | 0.000 | 1.000                       | 0.000 |
| 5'                  | 0.570 | 0.046 | 0.772         | 0.105 | 0.489         | 0.112 | 0.679                       | 0.084 |
| 10'                 | 0.451 | 0.032 | 0.734         | 0.003 | 0.251         | 0.073 | 0.782                       | 0.039 |
| 15'                 | 0.310 | 0.081 | 0.545         | 0.076 | 0.170         | 0.016 | 0.541                       | 0.062 |
