# Supplementary material for: A conserved RNA seed‐pairing domain directs small RNA‐mediated stress resistance in enterobacteria
Source: PubMed Central journal article supplement — EMBO J. 2019 Jul 17;38(16):e101650. doi: 10.15252/embj.2019101650 (PMC6694218; doi:10.15252/embj.2019101650), 2019-07-17
Supplement: EMBJ-38-e101650-s006.pdf [file EMBJ-38-e101650-s006.pdf]

# Source Data Fig.4

## Fig. 4B OmpT-3xFLAG

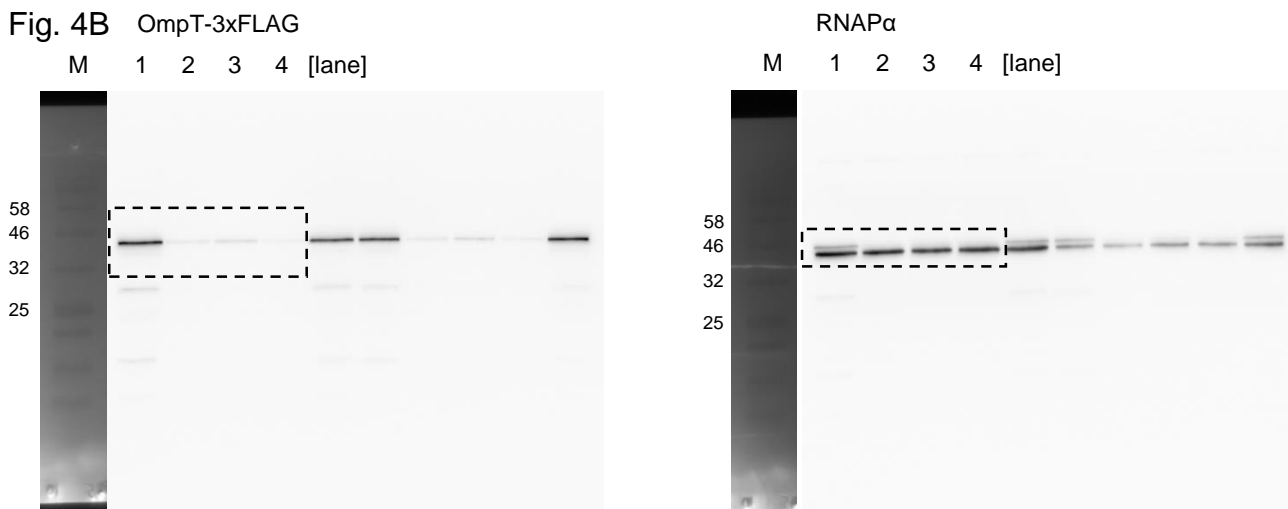

Quantification

| OmpT   |     | Lane 1  |       | Lane 2 |        | Lane 3 |       | Lane 4 |  |
|--------|-----|---------|-------|--------|--------|--------|-------|--------|--|
| Number | %   | Volume  | %     | Volume | %      | Volume | %     | Volume |  |
| No 1   | 100 | 8967656 | 8.532 | 765105 | 10.427 | 935042 | 4.779 | 428554 |  |

  

| RNAPα  |     | Lane 1   |         | Lane 2   |       | Lane 3   |         | Lane 4   |  |
|--------|-----|----------|---------|----------|-------|----------|---------|----------|--|
| Number | %   | Volume   | %       | Volume   | %     | Volume   | %       | Volume   |  |
| No 1   | 100 | 11111413 | 104.698 | 11633378 | 90.74 | 10082446 | 104.962 | 11662803 |  |

KPO-820 MicV

1 2 3 4 [lane]

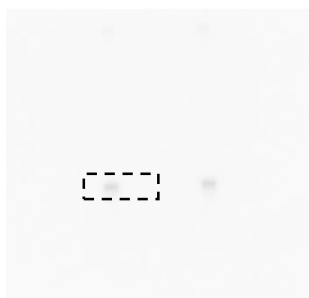

KPO-236 VrrA

1 2 3 4 [lane]

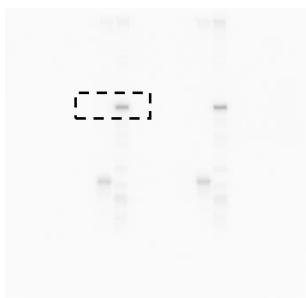

KPO-4356 RybB

1 2 3 4 [lane]

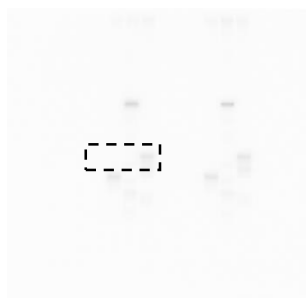

KPO-243 5S rRNA

1 2 3 4 [lane]

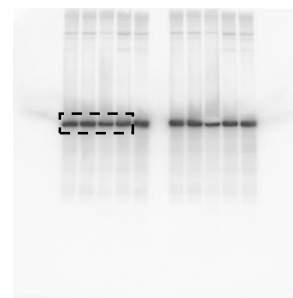

## Fig. 4C

upper panel

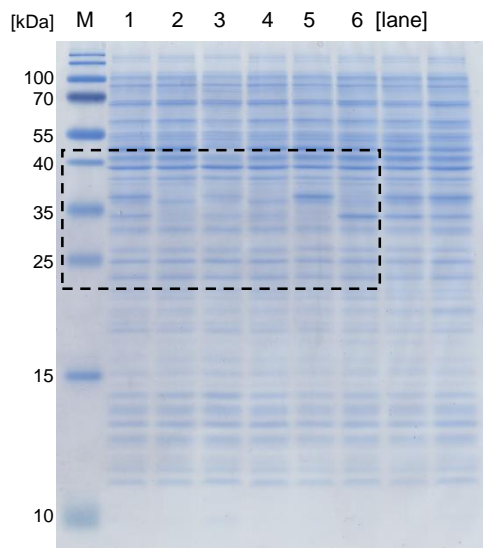

lower panel

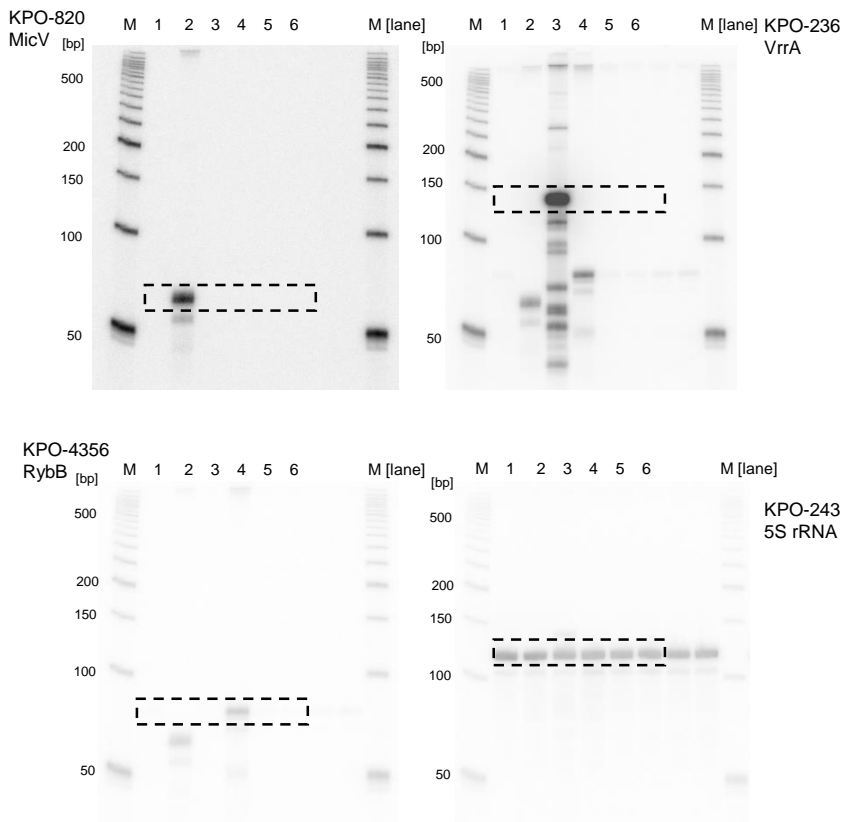

Source Data Fig.4

Fig. 4D

|      | WT pCtr       |       | $\Delta rpoE$ pCtr |       | $\Delta rpoE$ pMicV |       | $\Delta rpoE$ pVrrA |       | $\Delta rpoE$ pRybB |       |
|------|---------------|-------|--------------------|-------|---------------------|-------|---------------------|-------|---------------------|-------|
|      | CFU/ml        | log10 | CFU/ml             | log10 | CFU/ml              | log10 | CFU/ml              | log10 | CFU/ml              | log10 |
| Rep1 | 3916666666.67 | 9.59  | 37083.33           | 4.57  | 1591666666.67       | 8.20  | 1416666666.67       | 9.15  | 2003333333.33       | 9.30  |
| Rep2 | 3300000000.00 | 9.52  | 27500.00           | 4.44  | 92500000.00         | 7.97  | 1200000000.00       | 9.08  | 1168333333.33       | 9.07  |
| Rep3 | 2820833333.33 | 9.45  | 25416.67           | 4.41  | 46250000.00         | 7.67  | 1088333333.33       | 9.04  | 873333333.33        | 8.94  |
| Rep4 | 3420833333.33 | 9.53  | 26250.00           | 4.42  | 38750000.00         | 7.59  | 1530000000.00       | 9.18  | 1368333333.33       | 9.14  |
| Rep5 | 3983333333.33 | 9.60  | 56666.67           | 4.75  | 29583333.33         | 7.47  | 720000000.00        | 8.86  | 955000000.00        | 8.98  |
| Rep6 | 3266666666.67 | 9.51  | 19583.33           | 4.29  | 32916666.67         | 7.52  | 1010000000.00       | 9.00  | 1398333333.33       | 9.15  |
| Rep7 | 2041666666.67 | 9.31  | 21250.00           | 4.33  | 22500000.00         | 7.35  | 1101666666.67       | 9.04  | 1005000000.00       | 9.00  |
| Rep8 | 2308333333.33 | 9.36  | 13333.33           | 4.12  | 59166666.67         | 7.77  | 1063333333.33       | 9.03  | 1245000000.00       | 9.10  |

Dataset 2: Related to Fig. 4D

**Normality Test (Kolmogorov-Smirnov):** Passed (P = 0.260)

**Equal Variance Test (Brown-Forsythe):** Passed (P = 0.094)

| Group Name          | N | Missing | Mean  | Std Dev | SEM    |
|---------------------|---|---------|-------|---------|--------|
| WT pCtr             | 8 | 0       | 9.485 | 0.104   | 0.0368 |
| $\Delta rpoE$ pCtr  | 8 | 0       | 4.416 | 0.187   | 0.0663 |
| $\Delta rpoE$ pMicV | 8 | 0       | 7.692 | 0.280   | 0.0989 |
| $\Delta rpoE$ pVrrA | 8 | 0       | 9.048 | 0.099   | 0.0352 |
| $\Delta rpoE$ pRybB | 8 | 0       | 9.084 | 0.115   | 0.0406 |

| Source of Variation | DF | SS      | MS     | F        | P      |
|---------------------|----|---------|--------|----------|--------|
| Between Groups      | 4  | 139.214 | 34.803 | 1181.418 | <0.001 |
| Residual            | 35 | 1.031   | 0.0295 |          |        |
| Total               | 39 | 140.245 |        |          |        |

The differences in the mean values among the treatment groups are greater than would be expected by chance; there is a statistically significant difference (P = <0.001).

Power of performed test with alpha = 0.050: 1.000

All Pairwise Multiple Comparison Procedures (Holm-Sidak method):  
Overall significance level = 0.05

| Comparison                                  | Diff of Means | t      | P      | P<0.050 |
|---------------------------------------------|---------------|--------|--------|---------|
| WT pCtr vs. $\Delta rpoE$ pCtr              | 5.069         | 59.069 | <0.001 | Yes     |
| $\Delta rpoE$ pRybB vs. $\Delta rpoE$ pCtr  | 4.667         | 54.387 | <0.001 | Yes     |
| $\Delta rpoE$ pVrrA vs. $\Delta rpoE$ pCtr  | 4.632         | 53.969 | <0.001 | Yes     |
| $\Delta rpoE$ pMicV vs. $\Delta rpoE$ pCtr  | 3.275         | 38.168 | <0.001 | Yes     |
| WT pCtr vs. $\Delta rpoE$ pMicV             | 1.794         | 20.901 | <0.001 | Yes     |
| $\Delta rpoE$ pRybB vs. $\Delta rpoE$ pMicV | 1.392         | 16.220 | <0.001 | Yes     |
| $\Delta rpoE$ pVrrA vs. $\Delta rpoE$ pMicV | 1.356         | 15.801 | <0.001 | Yes     |
| WT pCtr vs. $\Delta rpoE$ pVrrA             | 0.438         | 5.100  | <0.001 | Yes     |
| WT pCtr vs. $\Delta rpoE$ pRybB             | 0.402         | 4.681  | <0.001 | Yes     |
| $\Delta rpoE$ pRybB vs. $\Delta rpoE$ pVrrA | 0.036         | 0.419  | 0.678  | No      |
