# Supplementary material for: A conserved RNA seed‐pairing domain directs small RNA‐mediated stress resistance in enterobacteria
Source: PubMed Central journal article supplement — EMBO J. 2019 Jul 17;38(16):e101650. doi: 10.15252/embj.2019101650 (PMC6694218; doi:10.15252/embj.2019101650), 2019-07-17
Supplement: EMBJ-38-e101650-s007.pdf [file EMBJ-38-e101650-s007.pdf]

Source Data Fig.5

Fig. 5B

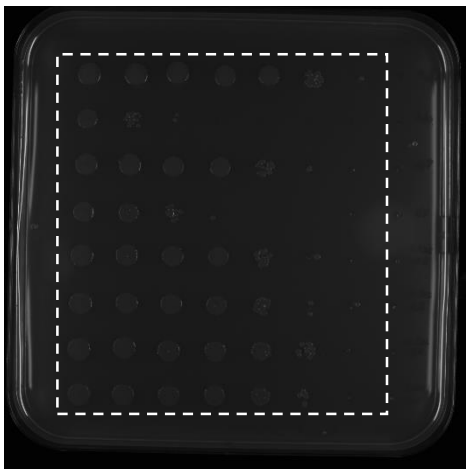

Fig. 5C

|      | detected seq. variants |          | complexity |      | CRCUGCUUUU |       |
|------|------------------------|----------|------------|------|------------|-------|
|      | mean                   | SD       | mean       | SD   | mean       | SD    |
| Sel0 | 253570.00              |          | 1.00       | 0.00 | 1.00       | 0.00  |
| Sel1 | 130544.50              | 20020.50 | 0.59       | 0.14 | 36.61      | 9.36  |
| Sel2 | 16427.00               | 4971.00  | 0.07       | 0.03 | 67.03      | 15.14 |
| Sel3 | 12526.50               | 3075.50  | 0.05       | 0.02 | 143.14     | 64.94 |
