# Supplementary material for: A conserved RNA seed‐pairing domain directs small RNA‐mediated stress resistance in enterobacteria
Source: PubMed Central journal article supplement — EMBO J. 2019 Jul 17;38(16):e101650. doi: 10.15252/embj.2019101650 (PMC6694218; doi:10.15252/embj.2019101650), 2019-07-17
Supplement: EMBJ-38-e101650-s008.pdf [file EMBJ-38-e101650-s008.pdf]

# Source Data Fig.6

## Fig. 6A

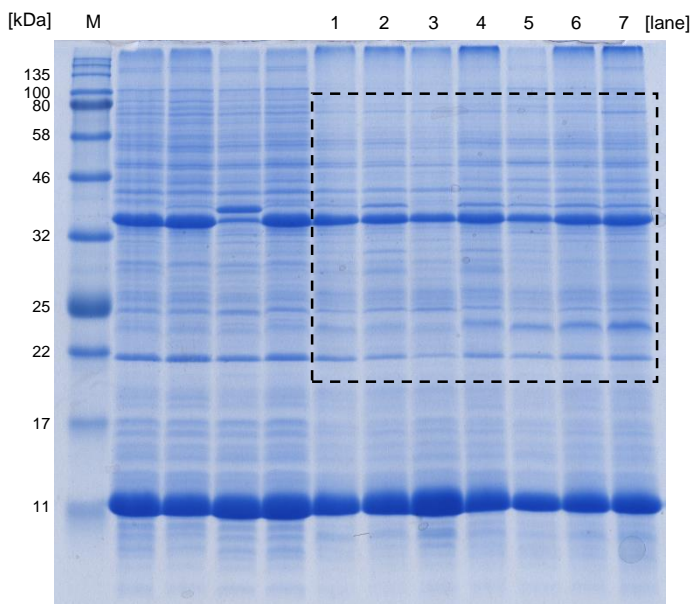

## Fig. 6B upper panel

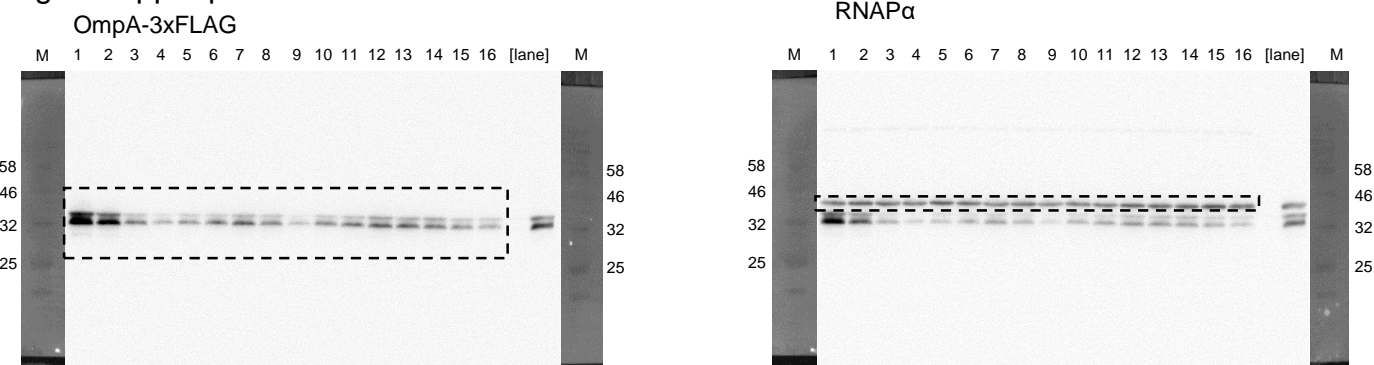

## Quantification

| OmpA     | lane1     | lane2    | lane3    | lane4    | lane5    | lane6    | lane7    | lane8    | lane9    | lane10   | lane11   | lane12   | lane13   | lane14   | lane15   | lane16   |
|----------|-----------|----------|----------|----------|----------|----------|----------|----------|----------|----------|----------|----------|----------|----------|----------|----------|
| Number   | Volume    | Volume   | Volume   | Volume   | Volume   | Volume   | Volume   | Volume   | Volume   | Volume   | Volume   | Volume   | Volume   | Volume   | Volume   | Volume   |
| up band  | 52768377  | 34048097 | 7554419  | 3609262  | 6581388  | 7213800  | 10648745 | 6940473  | 2789435  | 7763702  | 8617079  | 15071976 | 11922181 | 15598878 | 9411721  | 8243885  |
| low band | 158681861 | 94722892 | 35577505 | 14810754 | 21645975 | 33124989 | 39575529 | 30050775 | 11528871 | 28032184 | 34999919 | 43110794 | 44688839 | 32508411 | 24436555 | 16336135 |

  

| RNAPα | lane1    | lane2    | lane3    | lane4    | lane5    | lane6    | lane7    | lane8    | lane9    | lane10   | lane11   | lane12   | lane13   | lane14   | lane15   | lane16   |
|-------|----------|----------|----------|----------|----------|----------|----------|----------|----------|----------|----------|----------|----------|----------|----------|----------|
| No 1  | 48022759 | 43832738 | 36451715 | 32604945 | 40608606 | 37209394 | 30759478 | 35950173 | 43531892 | 56014643 | 31998509 | 63240067 | 39015650 | 60238070 | 68396535 | 38832824 |

## Fig. 6B lower panel

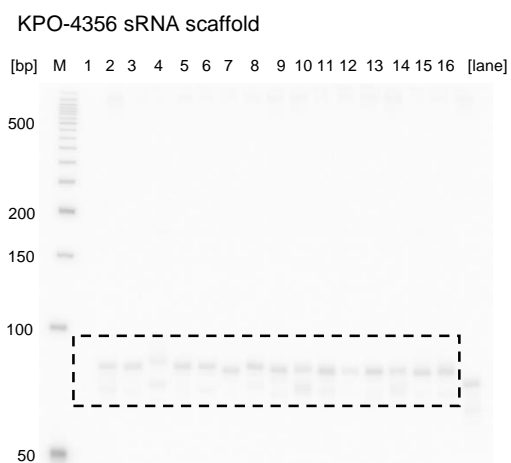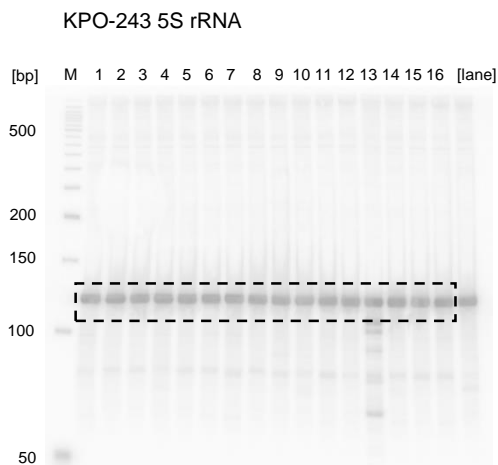

# Source Data Fig.6

## Fig. 6C

Data are: (fluorescence / OD600) - autofluorescence

|        | Rep1   | Rep2   | Rep3   |
|--------|--------|--------|--------|
| pCtr   | 170078 | 162994 | 145341 |
| pVar1  | 91176  | 89315  | 93287  |
| pVar2  | 49919  | 48831  | 48085  |
| pVar3  | 16461  | 14660  | 14636  |
| pVar4  | 33685  | 39459  | 36975  |
| pVar5  | 24530  | 26449  | 23286  |
| pVar6  | 48263  | 54838  | 55401  |
| pVar7  | 63041  | 51850  | 63674  |
| pVar8  | 28661  | 26984  | 25053  |
| pVar9  | 40006  | 51839  | 36659  |
| pVar10 | 47150  | 56919  | 53912  |
| pVar11 | 71370  | 81742  | 74400  |
| pVar12 | 41235  | 45611  | 47370  |
| pVar13 | 77257  | 75471  | 74435  |
| pVar14 | 44405  | 38854  | 38088  |
| pVar15 | 10687  | 11060  | 11212  |

## Fig. 6D

|      | WT pCtr       |       | $\Delta rpoE$ pCtr |       | $\Delta rpoE \Delta ompA$ pCtr |       | $\Delta ompA$ pCtr |       |
|------|---------------|-------|--------------------|-------|--------------------------------|-------|--------------------|-------|
|      | CFU/ml        | log10 | CFU/ml             | log10 | CFU/ml                         | log10 | CFU/ml             | log10 |
| Rep1 | 2162500000.00 | 9.33  | 93750.00           | 4.97  | 887500000.00                   | 8.95  | 2716666666.67      | 9.43  |
| Rep2 | 2716666666.67 | 9.43  | 19166.67           | 4.28  | 620833333.33                   | 8.79  | 3025000000.00      | 9.48  |
| Rep3 | 1970833333.33 | 9.29  | 35000.00           | 4.54  | 587500000.00                   | 8.77  | 2966666666.67      | 9.47  |
| Rep4 | 2062500000.00 | 9.31  | 20000.00           | 4.30  | 958333333.33                   | 8.98  | 3166666666.67      | 9.50  |
| Rep5 | 1991666666.67 | 9.30  | 20416.67           | 4.31  | 454166666.67                   | 8.66  | 3470833333.33      | 9.54  |
| Rep6 | 1937500000.00 | 9.29  | 10833.33           | 4.03  | 558333333.33                   | 8.75  | 2875000000.00      | 9.46  |
| Rep7 | 2908333333.33 | 9.46  | 9166.67            | 3.96  | 333333333.33                   | 8.52  | 2066666666.67      | 9.32  |
| Rep8 | 2241666666.67 | 9.35  | 18750.00           | 4.27  | 291666666.67                   | 8.46  | 1908333333.33      | 9.28  |

Dataset 3: Related to Fig. 6D

**Normality Test (Kolmogorov-Smirnov):** Passed (P = 0.054)

**Equal Variance Test (Brown-Forsythe):** Passed (P = 0.135)

| Group Name                | N | Missing | Mean  | Std Dev | SEM   |
|---------------------------|---|---------|-------|---------|-------|
| WT                        | 8 | 0       | 9.347 | 0.067   | 0.024 |
| $\Delta rpoE$             | 8 | 0       | 4.335 | 0.313   | 0.111 |
| $\Delta rpoE \Delta ompA$ | 8 | 0       | 8.735 | 0.183   | 0.065 |
| $\Delta ompA$             | 8 | 0       | 9.435 | 0.091   | 0.032 |

| Source of Variation | DF | SS      | MS     | F        | P      |
|---------------------|----|---------|--------|----------|--------|
| Between Groups      | 3  | 142.749 | 47.583 | 1318.582 | <0.001 |
| Residual            | 28 | 1.010   | 0.036  |          |        |
| Total               | 31 | 143.759 |        |          |        |

The differences in the mean values among the treatment groups are greater than would be expected by chance; there is a statistically significant difference (P = <0.001).

Power of performed test with alpha = 0.050: 1.000

All Pairwise Multiple Comparison Procedures (Holm-Sidak method):  
Overall significance level = 0.05

Comparisons for factor:

| Comparison                                  | Diff of Means | t      | P      | P<0.050 |
|---------------------------------------------|---------------|--------|--------|---------|
| $\Delta ompA$ vs. $\Delta rpoE$             | 5.100         | 53.698 | <0.001 | Yes     |
| WT vs. $\Delta rpoE$                        | 5.012         | 52.772 | <0.001 | Yes     |
| $\Delta rpoE \Delta ompA$ vs. $\Delta rpoE$ | 4.400         | 46.330 | <0.001 | Yes     |
| $\Delta ompA$ vs. $\Delta rpoE \Delta ompA$ | 0.700         | 7.369  | <0.001 | Yes     |
| WT vs. $\Delta rpoE \Delta ompA$            | 0.612         | 6.442  | <0.001 | Yes     |
| $\Delta ompA$ vs. WT                        | 0.088         | 0.926  | 0.362  | No      |
